# Supplementary material
Source: PubMed Central journal article supplement (PMC5635924)
Supplement: pnas.1712381114.sd01.pdf [file pnas.1712381114.sd01.pdf]

| Reference                   | Geographic Location               | Biome                              | Observation Site                     | Phenology / Leaf Form              | Growth Form         | Common Name                     | Species Name                    | Max Rooting Depth (m) | Method               | Profile Data? | Annual Ppt (mm) | Seasonality           | PET (mm)              | Topo Position | Water Table Range (m) | Mean WT Depth (m)                        | Texture / Type                 | Hardpan Nature | Depth (m) | Bedrock Nature            | Depth (m)                             | Human Alteration                                       | Latitude (degree) | Longitude (degree) | Elevation (m) | Author Notes                                                                                                                                                                                                                                                                                                                                                                                                                                                            | Notes                                                                                                                                                                                                                                                                                                                                                                                                                                                                                                                                                                                                                                                                                                                                                                                                                                                                                  |
|-----------------------------|-----------------------------------|------------------------------------|--------------------------------------|------------------------------------|---------------------|---------------------------------|---------------------------------|-----------------------|----------------------|---------------|-----------------|-----------------------|-----------------------|---------------|-----------------------|------------------------------------------|--------------------------------|----------------|-----------|---------------------------|---------------------------------------|--------------------------------------------------------|-------------------|--------------------|---------------|-------------------------------------------------------------------------------------------------------------------------------------------------------------------------------------------------------------------------------------------------------------------------------------------------------------------------------------------------------------------------------------------------------------------------------------------------------------------------|----------------------------------------------------------------------------------------------------------------------------------------------------------------------------------------------------------------------------------------------------------------------------------------------------------------------------------------------------------------------------------------------------------------------------------------------------------------------------------------------------------------------------------------------------------------------------------------------------------------------------------------------------------------------------------------------------------------------------------------------------------------------------------------------------------------------------------------------------------------------------------------|
| Aaltonen, 1920              | Lapland, Sodankylä, N.            | boreal forest                      | Kaunisvaaran                         | evergreen needle-leaf              | tree                | pine                            | <i>Pinus</i> sp.                | 0.98                  | excavatio            | n             | drawings        |                       |                       |               |                       |                                          | sandy, stone                   |                |           |                           |                                       |                                                        | 67.2470           | 26.8505            | 170           |                                                                                                                                                                                                                                                                                                                                                                                                                                                                         | mean of 12 pines (1, 0.75, 0.35, 1.25, 0.5, 0.85, 0.5, 0.6, 1.55, 2.45,                                                                                                                                                                                                                                                                                                                                                                                                                                                                                                                                                                                                                                                                                                                                                                                                                |
| Aaltonen, 1920              | Lapland, Sodankylä, N.            | boreal forest                      | Pitkän palot                         | evergreen needle-leaf              | tree                | pine                            | <i>Pinus</i> sp.                | 1.00                  | excavatio            | n             | drawings        |                       |                       |               |                       |                                          | stone-free heath sand          |                |           |                           |                                       |                                                        | 67.8536           | 26.6652            | 228           |                                                                                                                                                                                                                                                                                                                                                                                                                                                                         | mean of 3 pines (1.2, 0.8, 1),                                                                                                                                                                                                                                                                                                                                                                                                                                                                                                                                                                                                                                                                                                                                                                                                                                                         |
| Aaltonen, 1920              | Lapland, Sodankylä, N.            | boreal forest                      | Rakkiluoston kangas                  | evergreen needle-leaf              | tree                | pine                            | <i>Pinus</i> sp.                | 0.56                  | excavatio            | n             | drawings        |                       |                       |               |                       |                                          | much stone                     |                |           |                           |                                       |                                                        | 67.1522           | 26.9400            | 238           |                                                                                                                                                                                                                                                                                                                                                                                                                                                                         | mean of 7 pines (1.8, 0.5, 0.15, 0.3, 0.2, 0.8, 0.2),                                                                                                                                                                                                                                                                                                                                                                                                                                                                                                                                                                                                                                                                                                                                                                                                                                  |
| Aaltonen, 1920              | Lapland, Sodankylä, N.            | boreal forest                      | Ojalahden Lehto                      | evergreen needle-leaf              | tree                | spruce                          | <i>Picea</i> sp.                | 0.90                  | excavatio            | n             | drawings        |                       |                       |               |                       |                                          |                                |                |           |                           |                                       |                                                        | 66.6373           | 25.3457            | 100           |                                                                                                                                                                                                                                                                                                                                                                                                                                                                         | mean of 4 spruce (0.9, 0.9, 0.8, 1),                                                                                                                                                                                                                                                                                                                                                                                                                                                                                                                                                                                                                                                                                                                                                                                                                                                   |
| Aaltonen, 1920              | Lapland, Sodankylä, N.            | boreal forest                      | Pitkän palot                         | deciduous broad-leaf               | tree                | birch                           | <i>Betula</i> sp.               | 0.85                  | excavatio            | n             | drawings        |                       |                       |               |                       |                                          | stone-free heath sand          |                |           |                           |                                       |                                                        | 67.8536           | 26.6652            | 228           |                                                                                                                                                                                                                                                                                                                                                                                                                                                                         | mean of 2 birch (0.9, 0.8),                                                                                                                                                                                                                                                                                                                                                                                                                                                                                                                                                                                                                                                                                                                                                                                                                                                            |
| Abbott et al. 1991          | SE Idaho, INEL                    | semi-arid shrub-steppe             | undisturbed site                     | perennial                          | grass               | crested wheatgrass              | <i>Agropyron cristatum</i> L.   | 0.75 - 1              | "1" radio tracer     | yes           | 224             | 36% in Apr-Jun        |                       |               |                       |                                          | sandy loam to clay; calcic     |                |           | basalt                    | 1.25                                  | transplante ed 2yr ago                                 | 43.5227           | -112.0525          | 1441          | soil moisture, rather than soil disturbance, seemed to dictate root depth; The field work for this study was conducted in June and July of 1987 and 1988, two very dry years that received only half of the usual winter soil moisture recharge; Variations in the soil water content are frequently the major cause of differences in maximum rooting depth; soil moisture is measured to the maximum depth allowed (20-141 cm) by the underlying bedrock. The maximum |                                                                                                                                                                                                                                                                                                                                                                                                                                                                                                                                                                                                                                                                                                                                                                                                                                                                                        |
| Abbott et al. 1991          | SE Idaho, INEL                    | semi-arid shrub-steppe             | undisturbed site                     | perennial                          | grass               | bottlebrush squirreltail        | <i>Elymus elymoides</i>         | 0.5 - 0.75            | "1" radio tracer     | yes           | 224             | 36% in Apr-Jun        |                       |               |                       |                                          | sandy loam to clay; calcic     |                |           | basalt                    |                                       | transplante ed 2yr ago                                 | 43.5227           | -112.0525          | 1441          |                                                                                                                                                                                                                                                                                                                                                                                                                                                                         | nice data showing how the wetting depth and the resulting soil moisture profile determines rooting depth, regardless disturbance - all it matters is the depth of soil wetting; site location guessed, to be near the INEL on an undisturbed lot                                                                                                                                                                                                                                                                                                                                                                                                                                                                                                                                                                                                                                       |
| Abbott et al. 1991          | SE Idaho, INEL                    | semi-arid shrub-steppe             | undisturbed site                     | perennial                          | grass               | stream bank wheatgrass          | <i>Lanceolatus</i>              | 0.75 - 1              | "1" radio tracer     | yes           | 224             | 36% in Apr-Jun        |                       |               |                       |                                          | sandy loam to clay; calcic     |                |           | basalt                    | 1.25                                  | transplante ed 2yr ago                                 | 43.5227           | -112.0525          | 1441          |                                                                                                                                                                                                                                                                                                                                                                                                                                                                         |                                                                                                                                                                                                                                                                                                                                                                                                                                                                                                                                                                                                                                                                                                                                                                                                                                                                                        |
| Abbott et al. 1991          | SE Idaho, INEL                    | semi-arid shrub-steppe             | undisturbed site                     | perennial                          | grass               | basin wildrye                   | <i>Leymus cinereus</i>          | 1 - 1.25              | "1" radio tracer     | yes           | 224             | 36% in Apr-Jun        |                       |               |                       |                                          | sandy loam to clay; calcic     |                |           | basalt                    | 1.25                                  | transplante ed 2yr ago                                 | 43.5227           | -112.0525          | 1441          |                                                                                                                                                                                                                                                                                                                                                                                                                                                                         |                                                                                                                                                                                                                                                                                                                                                                                                                                                                                                                                                                                                                                                                                                                                                                                                                                                                                        |
| Abbott et al. 1991          | SE Idaho, INEL                    | semi-arid shrub-steppe             | undisturbed site                     | evergreen needle-leaf              | shrub               | big sagebrush                   | <i>Artemisia tridentata</i>     | 0.75 - 1              | "1" radio tracer     | yes           | 224             | 36% in Apr-Jun        |                       |               |                       |                                          | sandy loam to clay; calcic     |                |           | basalt                    |                                       | transplante ed 2yr ago                                 | 43.5227           | -112.0525          | 1441          |                                                                                                                                                                                                                                                                                                                                                                                                                                                                         |                                                                                                                                                                                                                                                                                                                                                                                                                                                                                                                                                                                                                                                                                                                                                                                                                                                                                        |
| Abbott et al. 1991          | SE Idaho, INEL                    | semi-arid shrub-steppe             | undisturbed site                     | perennial                          | shrub               | yellow rabbitbrush              | <i>Chrysothamn</i>              | 1 - 1.25              | "1" radio tracer     | yes           | 224             | 36% in Apr-Jun        |                       |               |                       |                                          | sandy loam to clay; calcic     |                |           | basalt                    |                                       | transplante ed 2yr ago                                 | 43.5227           | -112.0525          | 1441          |                                                                                                                                                                                                                                                                                                                                                                                                                                                                         |                                                                                                                                                                                                                                                                                                                                                                                                                                                                                                                                                                                                                                                                                                                                                                                                                                                                                        |
| Abdelkrim et al. 2014       | Algeria, N. Africa                | Atlas Sahara                       | tree-3, male                         | deciduous broad-leaf               | tree                | Atlas ginkgo                    | <i>Pistacia atlantica</i>       | > 0.8                 | excavating half tree | drawings      |                 |                       |                       |               |                       | sandy-silt, calcareous                   | hardpan                        | 0.8            |           |                           |                                       |                                                        | 35.5330           | 3.9369             | 580           |                                                                                                                                                                                                                                                                                                                                                                                                                                                                         | 7 trees were excavated but very near one another; excavation lat-lon given cannot be right - routine it far south with >2100m                                                                                                                                                                                                                                                                                                                                                                                                                                                                                                                                                                                                                                                                                                                                                          |
| Abd et al., 2010            | N Slope of Alborz, SW Georgia, US | temperate broad-leaf, moist forest | experimental forest of U. meric site | deciduous evergreen needle-leaf    | tree                | Persian Longleaf pine           | <i>Parrotia longifolia</i>      | > 0.7                 | trench               | yes           | 1200            | rain mostly in winter |                       |               |                       | on a west-facing slope                   | thin soil mantle               |                |           | calcareous bedrock (lura) | 1                                     |                                                        | 36.5972           | 51.5609            | 381           |                                                                                                                                                                                                                                                                                                                                                                                                                                                                         | The site has relatively thin soil mantle, underlain by calcareous bedrock (lura). The two sites are located 95 km from one another and they experience similar climate. The sites were defined as xeric and mesic based on the drainage characteristics                                                                                                                                                                                                                                                                                                                                                                                                                                                                                                                                                                                                                                |
| Addington et al. 2006       | SW Georgia, US                    | Subtropical moist forest           | mesic site                           | evergreen needle-leaf              | tree                | Longleaf pine                   | <i>Pinus palustris</i>          | 2.20                  | excavatio            | n             | yes             | 1310                  |                       |               |                       | ridge upland sand                        | Typic sandy loam, clay soil    |                |           | argillic horizon          | 0.5                                   |                                                        | 31.2212           | -84.4730           | 42            |                                                                                                                                                                                                                                                                                                                                                                                                                                                                         | lat-lon approx., max root depth extran from Fig 3                                                                                                                                                                                                                                                                                                                                                                                                                                                                                                                                                                                                                                                                                                                                                                                                                                      |
| Albaugh et al. 2006         | Virginia / N. Carolina, SE        | temperate broad-leaf, moist forest | Virginia Piedmont (P)                | evergreen needle-leaf              | tree                | Loblolly pine                   | <i>Pinus taeda</i> L.           | 1.90                  | excavatio            | n             | yes             | 1092                  |                       |               |                       | well drained                             | clay soil                      |                |           |                           |                                       | pine plantations                                       | 36.6800           | -77.9900           | 107           |                                                                                                                                                                                                                                                                                                                                                                                                                                                                         | profile data available                                                                                                                                                                                                                                                                                                                                                                                                                                                                                                                                                                                                                                                                                                                                                                                                                                                                 |
| Albaugh et al. 2006         | Virginia / N. Carolina, SE        | temperate broad-leaf, moist forest | N. Carolina (lower Coastal)          | evergreen needle-leaf              | tree                | Loblolly pine                   | <i>Pinus taeda</i> L.           | 1.90                  | excavatio            | n             | yes             | 1219                  |                       |               |                       | poorly drained                           | clay soil                      |                |           |                           |                                       | pine plantations                                       | 35.1103           | -76.5991           | 1             |                                                                                                                                                                                                                                                                                                                                                                                                                                                                         | profile data available; site moved off the water to the nearest forest profile data available; extrapolated                                                                                                                                                                                                                                                                                                                                                                                                                                                                                                                                                                                                                                                                                                                                                                            |
| Albaugh et al. 2006         | Virginia / N. Carolina, SE        | temperate broad-leaf, moist forest | N. Carolina Sandhills (S)            | evergreen needle-leaf              | tree                | Loblolly pine                   | <i>Pinus taeda</i> L.           | 3.50                  | excavatio            | n             | yes             | 1220                  |                       |               |                       | well drained                             | sandy soil                     |                |           |                           |                                       | pine plantations repeatedly cut and repeatedly cut and | 34.9100           | -79.4800           | 80            |                                                                                                                                                                                                                                                                                                                                                                                                                                                                         |                                                                                                                                                                                                                                                                                                                                                                                                                                                                                                                                                                                                                                                                                                                                                                                                                                                                                        |
| Alexandre & Ouedraogo, 2006 | West Africa, Burkina Faso         | tree savanna                       | Watinoma                             | deciduous broad-leaf               | tree                | Acacia albida                   | <i>Faidherbia albida</i>        | 5.90                  | excavatio            | n             | yes             |                       |                       |               |                       | poorly drained                           | deep sandy soil                |                |           | compact clay              | 1m                                    |                                                        | 13.6164           | -2.2887            | 346           |                                                                                                                                                                                                                                                                                                                                                                                                                                                                         | In Watinoma, F. albida is restricted to a plain, characterized by deep sandy soils and Figure 2 is typical of the peculiar morphology of F. albida existing in this area. Many studies have reported rooting depth in sunflower beyond 2.0 m, which is deeper than in sunflower. The tap root is the major channel for conducting water from deep in the soil. Both F. roseus and S. strobilata have long rhizomes that persist for approximately the same number of years, but the structure of the rhizomes and root systems differ. Both F. roseus and S. strobilata have long rhizomes that persist for approximately the same number of years, but the structure of the rhizomes and root systems differ. Both F. roseus and S. strobilata have long rhizomes that persist for approximately the same number of years, but the structure of the rhizomes and root systems differ. |
| Alexandre & Ouedraogo, 2006 | West Africa, Burkina Faso         | tree savanna                       | Rakaye Yarse                         | deciduous broad-leaf               | tree                | Acacia albida                   | <i>Faidherbia albida</i>        | 2.20                  | excavatio            | n             | yes             |                       |                       |               |                       | poorly drained                           | deep sandy soil                |                |           | compact clay              | 1m                                    |                                                        | 11.3180           | -2.2265            | 325           |                                                                                                                                                                                                                                                                                                                                                                                                                                                                         | Google search the village name found a map; water table inferred situated in the classified forest of Nazinon in Sissili province, 100 km from the village of Fig. 2A. Location picked to be on an area that looks like a channel for conducting water from deep in the soil. Both F. roseus and S. strobilata have long rhizomes that persist for approximately the same number of years, but the structure of the rhizomes and root systems differ. Both F. roseus and S. strobilata have long rhizomes that persist for approximately the same number of years, but the structure of the rhizomes and root systems differ. Both F. roseus and S. strobilata have long rhizomes that persist for approximately the same number of years, but the structure of the rhizomes and root systems differ.                                                                                  |
| Angadi & Entz, 2002         | Southern Manitoba, Canada         | Prairie                            | Winnipeg Plant Science               | annual herb                        | sunflower           | <i>Helianthus annuus</i>        | 1.20                            | trench                | yes                  | 310           |                 |                       |                       |               | flat land             | Sandy clay loam                          |                                |                |           |                           | annual crop                           | 49.4998                                                | -97.9478          | 258                |               |                                                                                                                                                                                                                                                                                                                                                                                                                                                                         |                                                                                                                                                                                                                                                                                                                                                                                                                                                                                                                                                                                                                                                                                                                                                                                                                                                                                        |
| Angadi & Entz, 2002         | Southern Manitoba, Canada         | Prairie                            | Winnipeg Plant Science               | annual herb                        | sunflower           | <i>Helianthus annuus</i>        | 1.80                            | trench                | yes                  | 340           |                 |                       |                       |               | flat land             | clay loam                                |                                |                |           |                           | annual crop                           | 49.8125                                                | -97.1208          | 231                |               |                                                                                                                                                                                                                                                                                                                                                                                                                                                                         |                                                                                                                                                                                                                                                                                                                                                                                                                                                                                                                                                                                                                                                                                                                                                                                                                                                                                        |
| Antos, 1988                 | Cascade MT., N. Oregon            | Mountain forest                    | an old-growth forest                 | perennial herb, with storage organ | herb                | Avalanche Lily                  | <i>Erythronium montanum</i>     | 0.19 (0.15-0.21)      | excavatio            | n             | drawings        | 2000                  | winter rain           |               |                       | high slope forest                        | deep pumice soils              |                |           |                           |                                       |                                                        | 45.3033           | -121.5124          | 1220          |                                                                                                                                                                                                                                                                                                                                                                                                                                                                         |                                                                                                                                                                                                                                                                                                                                                                                                                                                                                                                                                                                                                                                                                                                                                                                                                                                                                        |
| Antos, 1988                 | Cascade MT., N. Oregon            | Mountain forest                    | an old-growth forest                 | perennial herb                     | herb                | Queen of the Valley             | <i>Clinoloma uniflorum</i>      | 0.33 (0.1-0.3)        | excavatio            | n             | drawings        | 2000                  | winter rain           |               |                       | high slope forest                        | deep pumice soils              |                |           |                           |                                       |                                                        | 45.3033           | -121.5124          | 1220          |                                                                                                                                                                                                                                                                                                                                                                                                                                                                         |                                                                                                                                                                                                                                                                                                                                                                                                                                                                                                                                                                                                                                                                                                                                                                                                                                                                                        |
| Antos, 1988                 | Cascade MT., N. Oregon            | Mountain forest                    | a wet, old-growth forest             | perennial herb                     | herb                | Twistedstalk Rose               | <i>Streptopus roseus</i>        | 0.14 (0.1-0.19)       | excavatio            | n             | drawings        | 2000                  | winter rain           |               |                       | bottom stream                            | deep pumice soils              |                |           |                           |                                       |                                                        | 45.3086           | -121.5020          | 1040          |                                                                                                                                                                                                                                                                                                                                                                                                                                                                         |                                                                                                                                                                                                                                                                                                                                                                                                                                                                                                                                                                                                                                                                                                                                                                                                                                                                                        |
| Antos, 1988                 | Cascade MT., N. Oregon            | Mountain forest                    | a wet, old-growth forest             | perennial herb                     | herb                | Starry false lily of the valley | <i>Smilacina stellata</i>       | 0.26 (0.18-0.33)      | excavatio            | n             | drawings        | 2000                  | winter rain           |               |                       | bottom stream                            | deep pumice soils              |                |           |                           |                                       |                                                        | 45.3086           | -121.5020          | 1040          |                                                                                                                                                                                                                                                                                                                                                                                                                                                                         |                                                                                                                                                                                                                                                                                                                                                                                                                                                                                                                                                                                                                                                                                                                                                                                                                                                                                        |
| Antos, 1988                 | Cascade MT., N. Oregon            | Mountain forest                    | a wet, old-growth forest             | perennial herb                     | herb                | Wet, old-growth forest          | <i>Rubus pedatus</i>            | 0.17 (0.11-0.26)      | excavatio            | n             | drawings        | 2000                  | winter rain           |               |                       | bottom stream                            | deep pumice soils              |                |           |                           |                                       |                                                        | 45.3086           | -121.5020          | 1040          |                                                                                                                                                                                                                                                                                                                                                                                                                                                                         |                                                                                                                                                                                                                                                                                                                                                                                                                                                                                                                                                                                                                                                                                                                                                                                                                                                                                        |
| Antos, 1988                 | Cascade MT., N. Oregon            | Mountain forest                    | a wet, old-growth forest             | perennial herb                     | herb                | Roughfruit herry                | <i>Rubus</i>                    | 0.44 (0.27-0.61)      | excavatio            | n             | drawings        | 2000                  | winter rain           |               |                       | bottom stream                            | deep pumice soils              |                |           |                           |                                       |                                                        | 45.3086           | -121.5020          | 1040          |                                                                                                                                                                                                                                                                                                                                                                                                                                                                         |                                                                                                                                                                                                                                                                                                                                                                                                                                                                                                                                                                                                                                                                                                                                                                                                                                                                                        |
| Archer et al., 2002         | Almeria, SE Spain                 | Dry Mediterranean                  | Retama-site                          | perennial shrub                    | shrub               | Broom bush                      | <i>Indigofera tinctoria</i>     | 2.00                  | coring               | yes           | 300-350         | mainly Sept-May       |                       |               |                       | lower alluvial fan                       | alluvial loamy sands and fine  |                |           |                           |                                       |                                                        | 37.1257           | -2.3697            | 628           |                                                                                                                                                                                                                                                                                                                                                                                                                                                                         |                                                                                                                                                                                                                                                                                                                                                                                                                                                                                                                                                                                                                                                                                                                                                                                                                                                                                        |
| Archer et al., 2002         | Almeria, SE Spain                 | Dry Mediterranean                  | Anthyllis-site                       | perennial shrub                    | shrub               | Broom bush                      | <i>Anthyllis cytisoides</i>     | 1.50                  | coring               | yes           | 300-350         | mainly Sept-May       |                       |               |                       | upper alluvial fan                       | alluvial loamy sands and fine  |                |           |                           |                                       |                                                        | 37.1267           | -2.3673            | 632           |                                                                                                                                                                                                                                                                                                                                                                                                                                                                         |                                                                                                                                                                                                                                                                                                                                                                                                                                                                                                                                                                                                                                                                                                                                                                                                                                                                                        |
| Armas et al., 2010          | Almeria, SE Spain                 | Dry Mediterranean                  | coast of Spain                       | evergreen needle-leaf              | tree                | Phoenicean Juniper              | <i>Juniperus phoenicea</i>      | 2.50                  | coring               | no            | 220             | mainly winter         |                       |               |                       | on top of dunes                          | dune sand                      |                |           |                           |                                       |                                                        | 36.6903           | -2.7000            | 4             |                                                                                                                                                                                                                                                                                                                                                                                                                                                                         |                                                                                                                                                                                                                                                                                                                                                                                                                                                                                                                                                                                                                                                                                                                                                                                                                                                                                        |
| Armas et al., 2010          | Almeria, SE Spain                 | Dry Mediterranean                  | coast of Spain                       | evergreen needle-leaf              | shrub               | Mastic                          | <i>Pistacia lentiscus</i>       | 3.50                  | coring               | no            | 220             | mainly winter         |                       |               |                       | on top of dunes                          | dune sand                      |                |           |                           |                                       |                                                        | 36.6929           | -2.6960            | 4             |                                                                                                                                                                                                                                                                                                                                                                                                                                                                         |                                                                                                                                                                                                                                                                                                                                                                                                                                                                                                                                                                                                                                                                                                                                                                                                                                                                                        |
| Arnold, et al., 2004        | Taklamakan desert, W.             | arid desert                        |                                      | perennial legume                   | herb                | camelthorn or manna             | <i>Alhagi sparsifolia</i>       | 5                     | excavatio            | n             | drawings        | 40                    | hot dry summer        | 2600          | foreland of oasis     | > 7.5                                    | pure silt                      |                |           |                           |                                       |                                                        | 37.0196           | 80.7031            | 1358          |                                                                                                                                                                                                                                                                                                                                                                                                                                                                         | lat-lon approx.                                                                                                                                                                                                                                                                                                                                                                                                                                                                                                                                                                                                                                                                                                                                                                                                                                                                        |
| Arnold, et al., 2004        | Taklamakan desert, W.             | arid desert                        |                                      | deciduous broad-leaf               | shrub or small tree | salt cedar                      | <i>Tamarix ramosissima</i>      | 2                     | excavatio            | n             | drawings        | 40                    | hot dry summer        | 2600          | river bed             | 1.0 - 2.0                                | pure silt                      |                |           |                           |                                       |                                                        | 37.0224           | 80.7052            | 1353          |                                                                                                                                                                                                                                                                                                                                                                                                                                                                         | lat-lon approx.                                                                                                                                                                                                                                                                                                                                                                                                                                                                                                                                                                                                                                                                                                                                                                                                                                                                        |
| Arnold, et al., 2004        | Taklamakan desert, W.             | arid desert                        |                                      | deciduous broad-leaf               | tree                | Euphrates Poplar                | <i>Populus euphratica</i>       | 4                     | excavatio            | n             | drawings        | 40                    | hot dry summer        | 2600          | foreland of oasis     |                                          | 4.6                            | pure silt      |           |                           |                                       |                                                        | 37.0217           | 80.7021            | 1356          |                                                                                                                                                                                                                                                                                                                                                                                                                                                                         | lat-lon approx.                                                                                                                                                                                                                                                                                                                                                                                                                                                                                                                                                                                                                                                                                                                                                                                                                                                                        |
| Arnold, et al., 2004        | Taklamakan desert, W.             | arid desert                        |                                      | deciduous broad-leaf               | shrub               | Calligonum caput-medusae        | <i>Calligonum caput-medusae</i> | 7                     | excavatio            | n             | drawings        | 40                    | hot dry summer        | 2600          | foreland of oasis     | > 7.5                                    | pure silt                      |                |           |                           |                                       |                                                        | 37.0231           | 80.6988            | 1358          |                                                                                                                                                                                                                                                                                                                                                                                                                                                                         | lat-lon approx.                                                                                                                                                                                                                                                                                                                                                                                                                                                                                                                                                                                                                                                                                                                                                                                                                                                                        |
| Ash et al., 1975            | North Carolina                    | temperate mixed forest             | Research                             | perennial C3 bunchgrass            | tall fescue         | Fescue                          | <i>Festuca arundinacea</i>      | 1.5                   | soil coring to 1.65m | yes           |                 |                       |                       |               |                       | flat terrace, artificially               | loamy sand, mottled grey C     |                |           |                           | drained by tiles / drained by tiles / |                                                        | 35.8747           | -76.6555           | 5             |                                                                                                                                                                                                                                                                                                                                                                                                                                                                         | with seasonal distribution - it shows that root biomass changes across the season in the shallow soils, not deeper layers, at least for perennial grass such as this                                                                                                                                                                                                                                                                                                                                                                                                                                                                                                                                                                                                                                                                                                                   |
| Ash et al., 1975            | North Carolina                    | temperate mixed forest             | Plain                                | perennial C3 bunchgrass            | tall fescue         | Fescue                          | <i>Festuca arundinacea</i>      | 1.5                   | soil coring to 1.65m | yes           |                 |                       |                       |               |                       | flat terrace, artificially               | loamy sand, mottled grey C     |                |           |                           | drained by tiles / drained by tiles / |                                                        | 35.8941           | -77.6801           | 29            |                                                                                                                                                                                                                                                                                                                                                                                                                                                                         |                                                                                                                                                                                                                                                                                                                                                                                                                                                                                                                                                                                                                                                                                                                                                                                                                                                                                        |
| Ash et al., 1975            | North Carolina                    | temperate mixed forest             | Piedmont                             | perennial C3 bunchgrass            | tall fescue         | Fescue                          | <i>Festuca arundinacea</i>      | 1.5                   | soil coring to 1.65m | yes           |                 |                       |                       |               |                       | 3-5% slope, well drained on top of dunes | clay loam                      |                |           |                           |                                       | 35.6992                                                | -80.6201          | 223                |               |                                                                                                                                                                                                                                                                                                                                                                                                                                                                         |                                                                                                                                                                                                                                                                                                                                                                                                                                                                                                                                                                                                                                                                                                                                                                                                                                                                                        |
| Badia et al., 2011          | Bajo Cinca, NE Spain              | desert                             | Platform                             | evergreen needle-leaf              | shrub               | rosemary and thyme              | <i>Artemisia herba-alba</i>     | 0.35                  | soil pits            | no            | 350             | hot and windy         | 1240                  |               |                       | thin loam, with stone                    | limestone                      | 0.6-1.5        |           |                           |                                       |                                                        | 41.6315           | 0.1568             | 277           |                                                                                                                                                                                                                                                                                                                                                                                                                                                                         | using water table with the planned large-scale irrigation is warned for the platform and step units, and drainage and salt water disposal is recommended for the depressions, but no water table data was                                                                                                                                                                                                                                                                                                                                                                                                                                                                                                                                                                                                                                                                              |
| Badia et al., 2011          | Bajo Cinca, NE Spain              | desert                             | Step                                 | perennial herb                     | herb                | nitrohalophilo                  | <i>Suaeda vera</i>              | 0.35                  | soil pits            | no            | 350             | hot and windy         | 1240                  |               |                       | thin loam, with stone                    | limestone                      | 0.5            |           |                           |                                       |                                                        | 41.6314           | 0.1463             | 271           |                                                                                                                                                                                                                                                                                                                                                                                                                                                                         |                                                                                                                                                                                                                                                                                                                                                                                                                                                                                                                                                                                                                                                                                                                                                                                                                                                                                        |
| Badia et al., 2011          | Bajo Cinca, NE Spain              | desert                             | Depression                           | perennial herb                     | herb                | halophilo                       | <i>Artemisia herba-alba</i>     | 0.6-0.8               | soil pits            | no            | 350             | hot and windy         | 1240                  |               |                       | thin loam, with stone                    | limestone                      | 0.5            |           |                           |                                       |                                                        | 41.6361           | 0.1357             | 251           |                                                                                                                                                                                                                                                                                                                                                                                                                                                                         |                                                                                                                                                                                                                                                                                                                                                                                                                                                                                                                                                                                                                                                                                                                                                                                                                                                                                        |
| Baitulin, 1996              | Southern Kazakhstan               | xeric shrubland                    | southern desert                      | perennial shrub                    | shrub               | Winterfat (White)               | <i>Eurotia ceratoides</i>       | 9.2                   | excavatio            | n             | drawings        | 100-200               | falls in early spring |               |                       |                                          | loamy Sierozem                 |                |           |                           |                                       |                                                        | 45.0655           | 68.1023            | 145           |                                                                                                                                                                                                                                                                                                                                                                                                                                                                         | Thus, in loamy soil desert where the ground water is rather deep, the root location guessed                                                                                                                                                                                                                                                                                                                                                                                                                                                                                                                                                                                                                                                                                                                                                                                            |
| Baitulin, 1996              | Southern Kazakhstan               | xeric shrubland                    | southern desert                      | perennial shrub                    | shrub               | Winterfat (White)               | <i>Eurotia ceratoides</i>       | 6.1                   | excavatio            | n             | drawings        | 100-200               | falls in early spring |               |                       |                                          | meadow Sierozem                |                |           |                           |                                       |                                                        | 45.0278           | 67.4246            | 127           |                                                                                                                                                                                                                                                                                                                                                                                                                                                                         | location guessed to be in the saline meadows in southwest                                                                                                                                                                                                                                                                                                                                                                                                                                                                                                                                                                                                                                                                                                                                                                                                                              |
| Baitulin, 1996              | Southern Kazakhstan               | xeric shrubland                    | southern desert                      | perennial shrub                    | shrub               | Winterfat (White)               | <i>Eurotia ceratoides</i>       | 3                     | excavatio            | n             | drawings        | 100-200               | falls in early spring |               |                       |                                          | quick sand (dune??)            |                |           |                           |                                       |                                                        | 44.2836           | 69.2907            | 359           |                                                                                                                                                                                                                                                                                                                                                                                                                                                                         | location guessed to be on active dunes                                                                                                                                                                                                                                                                                                                                                                                                                                                                                                                                                                                                                                                                                                                                                                                                                                                 |
| Baitulin, 1996              | Southern Kazakhstan               | xeric shrubland                    | southern desert                      | perennial shrub                    | shrub               | Winterfat (White)               | <i>Eurotia ceratoides</i>       | 3                     | excavatio            | n             | drawings        | 100-200               | falls in early spring |               |                       |                                          | road metal soil                |                |           |                           |                                       |                                                        | 45.1175           | 67.4173            | 125           |                                                                                                                                                                                                                                                                                                                                                                                                                                                                         | cannot find definition of soil; location guessed to be along a high                                                                                                                                                                                                                                                                                                                                                                                                                                                                                                                                                                                                                                                                                                                                                                                                                    |
| Baitulin, 1996              | Southern Kazakhstan               | xeric shrubland                    | southern desert                      | perennial shrub                    | shrub               | Winterfat (White)               | <i>Eurotia ceratoides</i>       | 2.9                   | excavatio            | n             | drawings        | 100-200               | falls in early spring |               |                       |                                          | meadow Sierozem                |                |           |                           |                                       |                                                        | 45.0427           | 67.2934            | 124           |                                                                                                                                                                                                                                                                                                                                                                                                                                                                         | Thus, on meadow-sierozem saline soil, where the ground water is at 6.5 m depth, the root system of some deep-rooted plants (Alhagi pseudohaltai and Karelinia                                                                                                                                                                                                                                                                                                                                                                                                                                                                                                                                                                                                                                                                                                                          |
| Baitulin, 1996              | Southern Kazakhstan               | xeric shrubland                    | southern desert                      | perennial shrub                    | shrub               | Winterfat (White)               | <i>Eurotia ceratoides</i>       | 3.4                   | excavatio            | n             | drawings        | 100-200               | falls in early spring |               |                       |                                          | meadow Sierozem                |                |           |                           |                                       |                                                        | 45.0412           | 67.2955            | 125           |                                                                                                                                                                                                                                                                                                                                                                                                                                                                         | meadows in southwest                                                                                                                                                                                                                                                                                                                                                                                                                                                                                                                                                                                                                                                                                                                                                                                                                                                                   |
| Baitulin, 1996              | Southern Kazakhstan               | xeric shrubland                    | southern desert                      | perennial shrub                    | shrub               | Winterfat (White)               | <i>Eurotia ceratoides</i>       | 0.97                  | excavatio            | n             | drawings        | 100-200               | falls in early spring |               |                       |                                          | loamy Sierozem                 |                |           |                           |                                       |                                                        | 44.9656           | 68.0852            | 137           |                                                                                                                                                                                                                                                                                                                                                                                                                                                                         | location guessed to be in depressions                                                                                                                                                                                                                                                                                                                                                                                                                                                                                                                                                                                                                                                                                                                                                                                                                                                  |
| Baitulin, 1996              | Southern Kazakhstan               | xeric shrubland                    | southern desert                      | perennial shrub                    | shrub               | Winterfat (White)               | <i>Eurotia ceratoides</i>       | 2                     | excavatio            | n             | drawings        | 100-200               | falls in early spring |               |                       |                                          | saline crust                   |                |           |                           |                                       |                                                        | 46.1823           | 68.7113            | 186           |                                                                                                                                                                                                                                                                                                                                                                                                                                                                         | location guessed                                                                                                                                                                                                                                                                                                                                                                                                                                                                                                                                                                                                                                                                                                                                                                                                                                                                       |
| Baitulin, 1996              | Southern Kazakhstan               | xeric shrubland                    | southern desert                      | perennial shrub                    | shrub               | Winterfat (White)               | <i>Eurotia ceratoides</i>       | 7.3                   | excavatio            | n             | drawings        | 100-200               | falls in early spring |               |                       |                                          | light chestnut calcareous soil |                |           |                           |                                       |                                                        | 44.9840           | 68.0829            | 138           |                                                                                                                                                                                                                                                                                                                                                                                                                                                                         |                                                                                                                                                                                                                                                                                                                                                                                                                                                                                                                                                                                                                                                                                                                                                                                                                                                                                        |



[illegible]

[illegible]

[illegible]

[illegible]

|                         |                                 |                        |                             |                   |                       |                           |                         |           |                     |              |      |                         |                 |         |     |                                                                      |                 |          |              |          |           |      |                                                                                                                                                                                                             |                                                                        |
|-------------------------|---------------------------------|------------------------|-----------------------------|-------------------|-----------------------|---------------------------|-------------------------|-----------|---------------------|--------------|------|-------------------------|-----------------|---------|-----|----------------------------------------------------------------------|-----------------|----------|--------------|----------|-----------|------|-------------------------------------------------------------------------------------------------------------------------------------------------------------------------------------------------------------|------------------------------------------------------------------------|
| Das & Chaturvedi, 2004  | Pusa, Bihar, NE India           | agris/cultiv           | Research farm               | evergreen         | tree                  | Auri, Earleaf             | Acacia auriculiformis   | 2         | soil cores          | yes          | 1160 | 80% fall in monsoon Jun |                 |         |     |                                                                      |                 |          | tree/crop    | 25.9833  | 85.8000   | 53   | root distribution for five, four-year-old agroforestry tree species... Root spread exceeded the crown cover for all tree species. The first order lateral roots were more horizontal than the second order. | mean rooting depth of 5 trees; WT should be shallow here but it is not |
| Das & Chaturvedi, 2004  | Pusa, Bihar, NE India           | agris/cultiv           | Research farm               | evergreen         | tree                  | Neem, Nitrotree           | Asadipchia indica       | 1.2       | soil cores          | yes          | 1160 | 80% fall in monsoon Jun |                 |         |     |                                                                      |                 |          | tree/crop    | 25.9833  | 85.8000   | 53   | length and diameter of the main root were highest in A. indica (108.3 cm) and B. caba (23.2 cm) respectively. Maximum length of lateral roots was recorded in B. variegata                                  | mean rooting depth of 5 trees; WT should be shallow here but it is not |
| Das & Chaturvedi, 2004  | Pusa, Bihar, NE India           | agris/cultiv           | Research farm               | drought-deciduous | tree                  | Orchid tree, Camel's      | Bauhinia variegata      | 1         | soil cores          | yes          | 1160 | 80% fall in monsoon Jun |                 |         |     |                                                                      |                 |          | tree/crop    | 25.9833  | 85.8000   | 53   | length and diameter of the main root were highest in A. indica (108.3 cm) and B. caba (23.2 cm) respectively. Maximum length of lateral roots was recorded in B. variegata                                  | mean rooting depth of 5 trees; WT should be shallow here but it is not |
| Das & Chaturvedi, 2004  | Pusa, Bihar, NE India           | agris/cultiv           | Research farm               | deciduous         | tree                  | Red Silk-Cotton, Red      | Bombax                  | 1.6       | soil cores          | yes          | 1160 | 80% fall in monsoon Jun |                 |         |     |                                                                      |                 |          | tree/crop    | 25.9833  | 85.8000   | 53   | length and diameter of the main root were highest in A. indica (108.3 cm) and B. caba (23.2 cm) respectively. Maximum length of lateral roots was recorded in B. variegata                                  | mean rooting depth of 5 trees; WT should be shallow here but it is not |
| Das & Chaturvedi, 2004  | Pusa, Bihar, NE India           | agris/cultiv           | Research farm               | evergreen         | tree                  |                           | Wendlandia exserta      | 2.1       | soil cores          | yes          | 1160 | 80% fall in monsoon Jun |                 |         |     |                                                                      |                 |          | tree/crop    | 25.9833  | 85.8000   | 53   | length and diameter of the main root were highest in A. indica (108.3 cm) and B. caba (23.2 cm) respectively. Maximum length of lateral roots was recorded in B. variegata                                  | mean rooting depth of 5 trees; WT should be shallow here but it is not |
| Daubenmire, 1941        | Medicine Bowl Range             | alpine tundra          | on eastern                  | perennial         | forb                  | alpine bistort            | Polygonum viviparum     | 0.3       | excavation          | drawings     |      |                         |                 |         |     |                                                                      |                 |          | stony scree  | 41.3613  | -106.2945 | 3283 | This plant possesses a deeply imbedded, short rhizome approx 7 mm. in diameter.                                                                                                                             | mean rooting depth of 5 trees; WT should be shallow here but it is not |
| Daubenmire, 1941        | Medicine Bowl Range             | alpine tundra          | on eastern                  | perennial         | leaf-succulent        | alpine lewisia            | Lewisia                 | 0.1       | excavation          | drawings     |      |                         |                 |         |     |                                                                      |                 |          | stony scree  | 41.3613  | -106.2945 | 3283 | Lewisia has a thick fleshy tap root in which a great quantity of starch is stored.                                                                                                                          | mean rooting depth of 5 trees; WT should be shallow here but it is not |
| Daubenmire, 1941        | Medicine Bowl Range             | alpine tundra          | on eastern                  | perennial         | leaf-succulent        | moss campion              | Silene acaulis          | 0.2       | excavation          | drawings     |      |                         |                 |         |     |                                                                      |                 |          | stony scree  | 41.3605  | -106.2914 | 3304 | From the crown of a young plant prostrate branches arise which fork repeatedly, and many lateral branches originate from a crown about two centimeters below the                                            | mean rooting depth of 5 trees; WT should be shallow here but it is not |
| Daubenmire, 1941        | Medicine Bowl Range             | alpine tundra          | on eastern                  | perennial         | forb                  | spring sandwort           | Arenaria arquiculis A.  | 0.15      | excavation          | drawings     |      |                         |                 |         |     |                                                                      |                 |          | stony scree  | 41.3707  | -106.2756 | 3373 | This mat plant is one of the most abundant "alines" in the central Rockies. From the                                                                                                                        | mean rooting depth of 5 trees; WT should be shallow here but it is not |
| Daubenmire, 1941        | Medicine Bowl Range             | alpine tundra          | on eastern                  | perennial         | forb                  |                           | Arenaria sajanensis     | 0.4       | excavation          | drawings     |      |                         |                 |         |     |                                                                      |                 |          | stony scree  | 41.3418  | -106.3256 | 3247 | The root system of this plant is very extensive but otherwise lacks distinctive                                                                                                                             | mean rooting depth of 5 trees; WT should be shallow here but it is not |
| Daubenmire, 1941        | Medicine Bowl Range             | alpine tundra          | on eastern                  | perennial         | leaf-succulent        | Rocky Mountain Few-seeded | Paronychia pulvinata A. | 0.31      | excavation          | drawings     |      |                         |                 |         |     |                                                                      |                 |          | stony scree  | 41.3418  | -106.3256 | 3247 | The primary root and each of the few laterals produces a system of intricately                                                                                                                              | mean rooting depth of 5 trees; WT should be shallow here but it is not |
| Daubenmire, 1941        | Medicine Bowl Range             | alpine tundra          | on eastern                  | perennial         | leaf-succulent        | Draba wormleaf            | Draba oligosperma       | 0.26      | excavation          | drawings     |      |                         |                 |         |     |                                                                      |                 |          | stony scree  | 41.3418  | -106.3256 | 3247 | The principal branches of this succulent                                                                                                                                                                    | mean rooting depth of 5 trees; WT should be shallow here but it is not |
| Daubenmire, 1941        | Medicine Bowl Range             | alpine tundra          | on eastern                  | perennial         | leaf-succulent        | Draba wormleaf            | Sedum stenopetalum      | 0.1       | excavation          | drawings     |      |                         |                 |         |     |                                                                      |                 |          | stony scree  | 41.3418  | -106.3256 | 3247 | It can be found in many types of rocky habitat, such as cliffs, talus,                                                                                                                                      | mean rooting depth of 5 trees; WT should be shallow here but it is not |
| Daubenmire, 1941        | Medicine Bowl Range             | alpine tundra          | on eastern                  | perennial         | forb                  | dandelionleaf saxifrage   | Saxifraga ramboidea     | 0.1       | excavation          | drawings     |      |                         |                 |         |     |                                                                      |                 |          | stony scree  | 41.3538  | -106.3144 | 3337 | A great many blackish, firm-textured roots which radiate symmetrically outward and                                                                                                                          | mean rooting depth of 5 trees; WT should be shallow here but it is not |
| Daubenmire, 1941        | Medicine Bowl Range             | alpine tundra          | on eastern                  | perennial         | forb                  | mountain meadow           | Potentilla diversifolia | 0.48      | excavation          | drawings     |      |                         |                 |         |     |                                                                      |                 |          | stony scree  | 41.3538  | -106.3144 | 3337 | Several shoots may arise from buds at the base of the crown which is above ground                                                                                                                           | mean rooting depth of 5 trees; WT should be shallow here but it is not |
| Daubenmire, 1941        | Medicine Bowl Range             | alpine tundra          | on eastern                  | perennial         | forb                  | mountain meadow           | Potentilla nigropicta   | 0.35      | excavation          | drawings     |      |                         |                 |         |     |                                                                      |                 |          | stony scree  | 41.3538  | -106.3144 | 3337 | The strong tap root of this species usually gives rise to two or more laterals at a depth                                                                                                                   | mean rooting depth of 5 trees; WT should be shallow here but it is not |
| Daubenmire, 1941        | Medicine Bowl Range             | alpine tundra          | on eastern                  | perennial         | forb                  | alpine                    | Sieversia tuchinata     | 0.37      | excavation          | drawings     |      |                         |                 |         |     |                                                                      |                 |          | stony scree  | 41.3418  | -106.3256 | 3247 | A closely crowded row of adventitious roots arises from each of these oblique                                                                                                                               | mean rooting depth of 5 trees; WT should be shallow here but it is not |
| Daubenmire, 1941        | Medicine Bowl Range             | alpine tundra          | on eastern                  | perennial         | legume forb           | Parry Clover              | Trifolium agrifol       | 0.24      | excavation          | drawings     |      |                         |                 |         |     |                                                                      |                 |          | stony scree  | 41.3418  | -106.3256 | 3247 | The root system of this clover is both extensive and diffuse, while also being                                                                                                                              | mean rooting depth of 5 trees; WT should be shallow here but it is not |
| Daubenmire, 1941        | Medicine Bowl Range             | alpine tundra          | on eastern                  | perennial         | legume forb           | Shaggy Leaf Trifolium     | Trifolium dasycarpum    | 0.38      | excavation          | drawings     |      |                         |                 |         |     |                                                                      |                 |          | stony scree  | 41.3418  | -106.3256 | 3247 | The primary root system consists of a thoroughly tangled mass of root branches                                                                                                                              | mean rooting depth of 5 trees; WT should be shallow here but it is not |
| Daubenmire, 1941        | Medicine Bowl Range             | alpine tundra          | on eastern                  | annual            | forb                  | Pygmyflower               | Androsace subumbellata  | 0.1       | excavation          | drawings     |      |                         |                 |         |     |                                                                      |                 |          | stony scree  | 41.3418  | -106.3256 | 3247 | There are few annuals in the alpine tundra, but among these Androsace is one of the                                                                                                                         | mean rooting depth of 5 trees; WT should be shallow here but it is not |
| Daubenmire, 1941        | Medicine Bowl Range             | alpine tundra          | on eastern                  | perennial         | forb, matt            | Phlox tufted phlox        | Phlox caespitosa        | 0.35      | excavation          | drawings     |      |                         |                 |         |     |                                                                      |                 |          | stony scree  | 41.3530  | -106.2942 | 3293 | This plant has a tap root which gives rise to a great many finely branched whitish                                                                                                                          | mean rooting depth of 5 trees; WT should be shallow here but it is not |
| Daubenmire, 1941        | Medicine Bowl Range             | alpine tundra          | on eastern                  | perennial         | forb                  | Rocky Mountain arctic     | Polemonium confertum    | 0.55      | excavation          | drawings     |      |                         |                 |         |     |                                                                      |                 |          | stony scree  | 41.3418  | -106.3256 | 3247 | At a depth of about eight to ten centimeters the strong tap root of this plant                                                                                                                              | mean rooting depth of 5 trees; WT should be shallow here but it is not |
| Daubenmire, 1941        | Medicine Bowl Range             | alpine tundra          | on eastern                  | perennial         | forb                  | alpine                    | Eritrichum argenteum    | 0.24      | excavation          | drawings     |      |                         |                 |         |     |                                                                      |                 |          | stony scree  | 41.3418  | -106.3256 | 3247 | The tap root, which is about 2 to 4 mm. in diameter, is smooth, rigid, and unbranched                                                                                                                       | mean rooting depth of 5 trees; WT should be shallow here but it is not |
| Daubenmire, 1941        | Medicine Bowl Range             | alpine tundra          | on eastern                  | perennial         | forb                  | dwarf rhizomatous         | Erigeron compositus     | 0.09      | excavation          | drawings     |      |                         |                 |         |     |                                                                      |                 |          | stony scree  | 41.3418  | -106.3256 | 3247 | At a depth of less than a decimeter the tap root has completely divided into a diffuse                                                                                                                      | mean rooting depth of 5 trees; WT should be shallow here but it is not |
| Daubenmire, 1941        | Medicine Bowl Range             | alpine tundra          | on eastern                  | perennial         | forb                  | featherleaf fleabane      | Erigeron pinnatisectus  | 0.28      | excavation          | drawings     |      |                         |                 |         |     |                                                                      |                 |          | stony scree  | 41.3418  | -106.3256 | 3247 | This plant produces a tap root which gives rise to laterals of almost equal size. A few                                                                                                                     | mean rooting depth of 5 trees; WT should be shallow here but it is not |
| Daubenmire, 1941        | Medicine Bowl Range             | alpine tundra          | on eastern                  | perennial         | forb                  | Old Man of the Bear River | Rhysopis grandiflora    | 0.2       | excavation          | drawings     |      |                         |                 |         |     |                                                                      |                 |          | stony scree  | 41.3538  | -106.3144 | 3337 | This composite possesses stout tap root which tapers rapidly. The thickness of the                                                                                                                          | mean rooting depth of 5 trees; WT should be shallow here but it is not |
| Daubenmire, 1941        | Medicine Bowl Range             | alpine tundra          | on eastern                  | perennial         | forb                  | rhizomatous               | Erigeron ursinus        | 0.1       | excavation          | drawings     |      |                         |                 |         |     |                                                                      |                 |          | stony scree  | 41.3530  | -106.2942 | 3293 | From the short, erect caudex, which in older specimens becomes branched, there                                                                                                                              | mean rooting depth of 5 trees; WT should be shallow here but it is not |
| Daubenmire, 1941        | Medicine Bowl Range             | alpine tundra          | on eastern                  | perennial         | forb                  | Common yarrow             | Achillea subulnoides    | 0.16      | excavation          | drawings     |      |                         |                 |         |     |                                                                      |                 |          | stony scree  | 41.3418  | -106.3256 | 3247 | From the seedling I this plant arose from the primary root system practically                                                                                                                               | mean rooting depth of 5 trees; WT should be shallow here but it is not |
| Daubenmire, 1941        | Medicine Bowl Range             | alpine tundra          | on eastern                  | perennial         | forb                  | sagebrush                 | Atriplex scopulorum     | 0.25      | excavation          | drawings     |      |                         |                 |         |     |                                                                      |                 |          | stony scree  | 41.3418  | -106.3256 | 3247 | disappears with age, the plant depending                                                                                                                                                                    | mean rooting depth of 5 trees; WT should be shallow here but it is not |
| David et al., 2004      | near Evora, SE Lisbon, Portugal | Mediterranean woodland | Herdade da Mitra            | evergreen         | tree                  | sweet acorn oak           | Quercus robur L.        | 13        | tap flow, stem      | no           | 665  | 90% in Oct-Nov          | 1760            | 13-15   | 14  | very shallow (0.3m deep) well-drained deep clayic                    | fractured eneis | 0.3      | crown pruned | 38.5265  | -8.0184   | 243  | Tree roots must have direct access to the 3m deep water table in order to                                                                                                                                   | mean rooting depth of 5 trees; WT should be shallow here but it is not |
| David et al., 2013      | near Lisbon, Portugal           | Mediterranean woodland | Herdade da Mitra            | evergreen         | tree                  | cork oak                  | Quercus suber L.        | 6.5       | excavation          | drawing      | 708  | mostly in Oct-Nov       | 1347            | 1.5-4.5 | 4.5 | deeply weathered krazemzon, basic igneous, groundwater, podzol, deep |                 |          |              | 38.8337  | -8.8189   | 19   | Results showed a dimorphic root system with a network of superficial roots linked to                                                                                                                        | mean rooting depth of 5 trees; WT should be shallow here but it is not |
| Davidson et al., 2011   | Tasmania, Australia             | tree savanna           | National Stoodley           | evergreen         | tree                  | Monterey pine             | Pinus radiata           | 18.00     | soil cores          | yes          | 2000 | 6 (Jul-Dec)             |                 |         |     | deeply weathered krazemzon, basic igneous, groundwater, podzol, deep |                 |          |              | -2.8978  | -54.9528  | 198  | Active water uptake by deep roots to approximately 18 m depth can be inferred                                                                                                                               | mean rooting depth of 5 trees; WT should be shallow here but it is not |
| Davis et al., 1983      | Tasmania, Australia             | tree savanna           | Strahan                     | evergreen         | tree                  | Monterey pine             | Pinus radiata           | 0.90      | soil coring to 80cm | yes          | 1200 |                         |                 |         |     | mid slope                                                            | plantation      |          |              | -41.4018 | 146.4315  | 200  | On these five soils Pinus radiata exhibited similar plasticity of root form. Soil organic                                                                                                                   | mean rooting depth of 5 trees; WT should be shallow here but it is not |
| Davis et al., 1983      | Tasmania, Australia             | tree savanna           | Long Hill 1                 | evergreen         | tree                  | Monterey pine             | Pinus radiata           | 0.90      | soil coring to 80cm | yes          | 1200 |                         |                 |         |     | depression                                                           | plantation      |          |              | -42.1433 | 145.3131  | 14   | matter content provided the best correlation with root concentration with the                                                                                                                               | mean rooting depth of 5 trees; WT should be shallow here but it is not |
| Davis et al., 1983      | Tasmania, Australia             | tree savanna           | Long Hill 2                 | evergreen         | tree                  | Monterey pine             | Pinus radiata           | 0.90      | soil coring to 80cm | yes          | 1200 |                         |                 |         |     | base of slope                                                        | plantation      |          |              | -41.3915 | 146.5210  | 300  | five sites. The high correlation is likely to be due to the favourable moisture and                                                                                                                         | mean rooting depth of 5 trees; WT should be shallow here but it is not |
| Davis et al., 1983      | Tasmania, Australia             | tree savanna           | Mt. Helen                   | evergreen         | tree                  | Monterey pine             | Pinus radiata           | 0.90      | soil coring to 80cm | yes          | 1200 |                         |                 |         |     | podzol, acid igneous                                                 | plantation      |          |              | -41.3744 | 146.5149  | 271  | nutritional environments, where organic matter levels are greater, and to the                                                                                                                               | mean rooting depth of 5 trees; WT should be shallow here but it is not |
| Davis et al., 1983      | Tasmania, Australia             | tree savanna           | Mt. Helen                   | evergreen         | tree                  | Monterey pine             | Pinus radiata           | 0.90      | soil coring to 80cm | yes          | 1200 |                         |                 |         |     | mid slope                                                            | plantation      |          |              | -41.2611 | 147.5203  | 443  | observed preference for roots to grow from the primary root system practically                                                                                                                              | mean rooting depth of 5 trees; WT should be shallow here but it is not |
| Dawson, 1993            | Ithaca, NY                      | temperate hardwood     | site-1                      | deciduous         | tree                  | sugar maple               | Acer saccharum          | 1.5       | soil cores/pits     | yes          |      |                         |                 | 1.25-8  |     | glacial till, silty loam, deep                                       | fragipan        | 0.25-1.3 |              | 42.4428  | -76.4935  | 127  | Examination of root distributions obtained from soil cores and pits revealed that some                                                                                                                      | mean rooting depth of 5 trees; WT should be shallow here but it is not |
| Dawson & Pate, 1996     | SW Australia, near Perth        | Mediterranean woodland | site-1                      | evergreen         | tree                  | Banksia                   | Banksia grandis         | 1.8-2.6   | photos              |              |      |                         |                 | 1.8-2.6 |     | deep Bassetend deep sand on gravel                                   |                 |          |              | -31.5500 | 115.6833  | 24   | penetrating tap (sinker) roots obtained water of different origins over the course                                                                                                                          | mean rooting depth of 5 trees; WT should be shallow here but it is not |
| Dawson & Pate, 1996     | SW Australia, near Perth        | Mediterranean woodland | site-2                      | evergreen         | tree                  | Eucalyptus                | Eucalyptus albulus. F   | 5         | H isotop, excavatio | photos       |      |                         | 4-6             |         | 4.5 | deep sand on gravel                                                  |                 |          |              | -34.7927 | 116.0706  | 59   | of a winter-wet/summer-dry annual cycle                                                                                                                                                                     | mean rooting depth of 5 trees; WT should be shallow here but it is not |
| Day, 1941               | Upper P., Michigan              | Boreal forest          | plantation on Dunbar Forest | evergreen         | tree                  | red pine                  | Pinus resinosa          | 0.79      | excavatio           | drawings     |      |                         |                 |         |     | level, slow subsol                                                   | plantation      |          |              | 46.3382  | -84.2262  | 179  | conditions in that early seasons of moisture was not excessive and late season                                                                                                                              | mean rooting depth of 5 trees; WT should be shallow here but it is not |
| Day, 1941               | Upper P., Michigan              | Boreal forest          | plantation on Dunbar Forest | evergreen         | tree                  | red pine                  | Pinus resinosa          | 1.01      | excavatio           | drawings     |      |                         |                 |         |     | level, slow subsol                                                   | plantation      |          |              | 46.3382  | -84.2262  | 179  | soil moisture was usually adequate. Sinker                                                                                                                                                                  | mean rooting depth of 5 trees; WT should be shallow here but it is not |
| Day, 1941               | Upper P., Michigan              | Boreal forest          | plantation on Dunbar Forest | evergreen         | tree                  | red pine                  | Pinus resinosa          | 0.49      | excavatio           | drawings     |      |                         |                 |         |     | level, slow subsol                                                   | plantation      |          |              | 46.3382  | -84.2262  | 179  | Tree 10 was exposed to excessive moisture in the early part of the growing season                                                                                                                           | mean rooting depth of 5 trees; WT should be shallow here but it is not |
| Day, 1941               | Upper P., Michigan              | Boreal forest          | Natural site off Dunbar     | evergreen         | tree                  | red pine                  | Pinus resinosa          | 1.89      | excavatio           | drawings     |      |                         |                 |         |     | Pine plain, good                                                     |                 |          |              | 46.3067  | -84.2462  | 196  | It can be noted that trees 1 and 9 have the largest root systems despite the fact                                                                                                                           | mean rooting depth of 5 trees; WT should be shallow here but it is not |
| Day, 1941               | Upper P., Michigan              | Boreal forest          | Natural site off Dunbar     | evergreen         | tree                  | red pine                  | Pinus resinosa          | 1.52      | excavatio           | drawings     |      |                         |                 |         |     | Pine plain, good                                                     |                 |          |              | 46.3067  | -84.2462  | 196  | that they are not the largest trees nor are they any ruder than the other trees. They                                                                                                                       | mean rooting depth of 5 trees; WT should be shallow here but it is not |
| Dell et al., 1983       | Jarrahdale, W.A.                | Mediterranean forest   | undisturbed forest, upland  | evergreen         | tree                  | jarrah                    | Eucalyptus marginata    | 14.00     | excavatio           | yes + photos | 1000 | 80% in 5 winter mon     |                 |         |     | upland position                                                      | granite         | 14       |              | -32.3383 | 116.0904  | 273  | A dense mat of surface roots occupied the shallow topsoil (30 cm deep). Sinker roots                                                                                                                        | mean rooting depth of 5 trees; WT should be shallow here but it is not |
| Dell et al., 1983       | Jarrahdale, W.A.                | Mediterranean forest   | undisturbed forest, upland  | evergreen         | tree                  | jarrah                    | Eucalyptus marginata    | 40        | excavatio           | yes + photos | 1000 | 80% in 5 winter mon     |                 |         |     | gravelly sand (1-3m), on                                             | granite         | 40       |              | -32.3426 | 116.0882  | 243  | in four rather than recovered to 40 m in the downslope site (Fig. 6). These roots                                                                                                                           | mean rooting depth of 5 trees; WT should be shallow here but it is not |
| Derbel and Chaieb, 2012 | Central Tunisia                 | Saharian desert        | perennial                   | xerophytic shrub  | phog                  | Calligonum polygonoides   | 2.2                     | drawings  |                     |              |      | no rain Jun-Aug         |                 |         |     | dune                                                                 |                 |          |              | 33.4911  | 8.7969    | 27   | The coarse root systems of C. polygonoides were characterized by an intensive shallow                                                                                                                       | mean rooting depth of 5 trees; WT should be shallow here but it is not |
| Derbel and Chaieb, 2012 | Central Tunisia                 | Saharian desert        | perennial                   | xerophytic shrub  | phog                  | Ephedra alata             | Ephedra alata           | 1.9       | excavatio           | drawings     |      |                         | no rain Jun-Aug |         |     | sand                                                                 |                 |          |              | 33.3803  | 8.7393    | 44   | Al. alata showed a dual strategy, that is, development of a deep taproot with                                                                                                                               | mean rooting depth of 5 trees; WT should be shallow here but it is not |
| Derbel and Chaieb, 2012 | Central Tunisia                 | Saharian desert        | perennial                   | xerophytic shrub  | phog                  | Antyllus henoniana        | Antyllus henoniana      | 1.2       | excavatio           | drawings     |      |                         | no rain Jun-Aug |         |     | loamy sand                                                           |                 |          |              | 33.2847  | 9.6914    | 203  | Antyllus henoniana was a tap-rooted perennial shrub. Its short pivot root                                                                                                                                   | mean rooting depth of 5 trees; WT should be shallow here but it is not |
| Derbel and Chaieb, 2012 | Central Tunisia                 | Saharian desert        | perennial                   | xerophytic shrub  | phog                  | Henophyton deserti        | Henophyton deserti      | 1.6       | excavatio           | drawings     |      |                         | no rain Jun-Aug |         |     | sand                                                                 |                 |          |              | 33.2847  | 9.7114    | 197  | The root system of H. deserti was both                                                                                                                                                                      | mean rooting depth of 5 trees; WT should be shallow here but it is not |
| Dittmer, 1959           | North-Central Arizona           | arid desert            | perennial                   | small shrub       | bush morning          | Lepargophylla             | Lepargophylla           | 1.85      | excavatio           | drawings     |      |                         |                 |         |     | dune                                                                 |                 |          |              | 35.4248  | -106.6531 | 1652 | most conspicuous of the larger species on the dunes and throughout most of the                                                                                                                              | mean rooting depth of 5 trees; WT should be shallow here but it is not |
| Dittmer, 1959           | North-Central Arizona           | arid desert            | annual                      | herb              | prickly Russian       | Salsola pestifer A.       | 0.67                    | excavatio | drawings            |              |      |                         |                 |         |     | shallow                                                              |                 |          |              | 35.4415  | -106.6512 | 1622 | Root systems of 13 species were examined from several sites                                                                                                                                                 | mean rooting depth of 5 trees; WT should be shallow here but it is not |
| Dittmer, 1959           | North-Central Arizona           | arid desert            | perennial                   | herb              | Silverleaf nightshade | Solanum elaeagnifolium    | 1.14                    | excavatio | drawings            |              |      |                         |                 |         |     | sandy areas                                                          |                 |          |              | 35.3818  | -106.6305 | 1685 | The dunes extend for about 20 miles along an intermittent stream                                                                                                                                            | mean rooting depth of 5 trees; WT should be shallow here but           |











|                        |                                         |                                 |                                             |                       |            |                       |                                |       |                       |                     |         |                    |                                        |           |     |                                 |           |      |  |          |                                           |           |           |                                                                                                                                                                                                                                                                                                                                                                                                                                                                                                                                                                                                                                                                                                                                                              |                                                                                                                                                                                                                                                                                                                                                                                                                          |  |
|------------------------|-----------------------------------------|---------------------------------|---------------------------------------------|-----------------------|------------|-----------------------|--------------------------------|-------|-----------------------|---------------------|---------|--------------------|----------------------------------------|-----------|-----|---------------------------------|-----------|------|--|----------|-------------------------------------------|-----------|-----------|--------------------------------------------------------------------------------------------------------------------------------------------------------------------------------------------------------------------------------------------------------------------------------------------------------------------------------------------------------------------------------------------------------------------------------------------------------------------------------------------------------------------------------------------------------------------------------------------------------------------------------------------------------------------------------------------------------------------------------------------------------------|--------------------------------------------------------------------------------------------------------------------------------------------------------------------------------------------------------------------------------------------------------------------------------------------------------------------------------------------------------------------------------------------------------------------------|--|
| Howard, 1925           | Pusa, N Bihar, India, on the            | orchards and rice fields        | tree experiment                             | deciduous broad-leaf  | tree       | custard apple         | <i>Annona squamosa</i>         | 4.29  | exposure by           | descriptive e. with | 1207    | mostly in Jun      | ridges, on old alluvium                | 1.1 - 6.1 | 5   | calcareous silt (loam 75% sand) |           |      |  | orchards | 25.9837                                   | 85.6804   | 58        | the root system of custard apple is very similar to that of plum and peach; in the 12 root distribution and periodicity of root activities of this evergreen resemble those                                                                                                                                                                                                                                                                                                                                                                                                                                                                                                                                                                                  | percolation stops; the plants soon respond to the altered soil conditions; the absorbing roots in the lower layers die; the soil acts as vast reservoir of water and make up for the uneven rain; trees burst into activity in Mar-May, hot and dry part of the year, perhaps the most striking feature of vegetation in this area, when grass is planted an forest in Pusa Research Institute, N Bihar, India is chosen |  |
| Howard, 1925           | Pusa, N Bihar, India, on the            | orchards and rice fields        | tree experiment                             | deciduous broad-leaf  | tree       | mango                 | <i>Mangifera indica</i>        | 4.70  | exposure by           | descriptive e. with | 1207    | mostly in Jun      | ridges, on old alluvium                | 1.1 - 6.1 | 5   | calcareous silt (loam 75% sand) |           |      |  | orchards | 25.9837                                   | 85.6804   | 58        |                                                                                                                                                                                                                                                                                                                                                                                                                                                                                                                                                                                                                                                                                                                                                              |                                                                                                                                                                                                                                                                                                                                                                                                                          |  |
| Howard, 1925           | Pusa, N Bihar, India, on the            | orchards and rice fields        | tree experiment                             | evergreen broad-leaf  | tree       | Guava                 | <i>Psidium guajava</i>         | 4.40  | exposure by           | descriptive e. with | 1207    | mostly in Jun      | ridges, on old alluvium                | 1.1 - 6.1 | 5   | calcareous silt (loam 75% sand) |           |      |  | orchards | 25.9837                                   | 85.6804   | 58        | there is an abundant superficial system, which gives off numerous branches, which mostly like the others, but the deep root system is less strongly developed: similar to litchi, but deep roots are even less developed: strong aversion to clay: the two root system and periodicity is similar to mango: roots found 1 feet below two kinds of roots occurred - a well-developed surface system which was then all the forest trees are similar to the fruit trees with 2 root systems; the deep root best example of tree repairing deep roots damaged by the continued rise of water the deep roots of this tree differs from others - they do not grow vertically down                                                                                 |                                                                                                                                                                                                                                                                                                                                                                                                                          |  |
| Howard, 1925           | Pusa, N Bihar, India, on the            | orchards and rice fields        | tree experiment                             | evergreen broad-leaf  | tree       | Litchi                | <i>Nephelium litchi</i>        | 3.80  | exposure by           | descriptive e. with | 1207    | mostly in Jun      | ridges, on old alluvium                | 1.1 - 6.1 | 5   | calcareous silt (loam 75% sand) |           |      |  | orchards | 25.9837                                   | 85.6804   | 58        |                                                                                                                                                                                                                                                                                                                                                                                                                                                                                                                                                                                                                                                                                                                                                              |                                                                                                                                                                                                                                                                                                                                                                                                                          |  |
| Howard, 1925           | Pusa, N Bihar, India, on the            | orchards and rice fields        | tree experiment                             | deciduous broad-leaf  | tree       | sour lime             | <i>Citrus medica</i>           | 2.00  | exposure by           | descriptive e. with | 1207    | mostly in Jun      | ridges, on old alluvium                | 1.1 - 6.1 | 5   | calcareous silt (loam 75% sand) |           |      |  | orchards | 25.9837                                   | 85.6804   | 58        |                                                                                                                                                                                                                                                                                                                                                                                                                                                                                                                                                                                                                                                                                                                                                              |                                                                                                                                                                                                                                                                                                                                                                                                                          |  |
| Howard, 1925           | Pusa, N Bihar, India, on the            | orchards and rice fields        | tree experiment                             | evergreen broad-leaf  | tree       | Loquat                | <i>Eriobotrya japonica</i>     | 4.90  | exposure by           | descriptive e. with | 1207    | mostly in Jun      | ridges, on old alluvium                | 1.1 - 6.1 | 5   | calcareous silt (loam 75% sand) |           |      |  | orchards | 25.9837                                   | 85.6804   | 58        |                                                                                                                                                                                                                                                                                                                                                                                                                                                                                                                                                                                                                                                                                                                                                              |                                                                                                                                                                                                                                                                                                                                                                                                                          |  |
| Howard, 1925           | Pusa, N Bihar, India, on the            | subtropical monsoon forest site | forest site                                 | deciduous broad-leaf  | tree       | Indian Rosewood       | <i>Dalbergia latifolia</i>     | 4.50  | exposure by           | descriptive e. with | 1207    | mostly in Jun      | ridges, on old alluvium                | 1.1 - 6.1 | 5.2 | calcareous silt (loam 75% sand) |           |      |  |          | 25.9886                                   | 85.6879   | 59        |                                                                                                                                                                                                                                                                                                                                                                                                                                                                                                                                                                                                                                                                                                                                                              |                                                                                                                                                                                                                                                                                                                                                                                                                          |  |
| Howard, 1925           | Pusa, N Bihar, India, on the            | subtropical monsoon forest site | forest site                                 | deciduous broad-leaf  | tree       | Indian gooseberry     | <i>Phyllanthus emblica</i>     | 5.80  | exposure by           | descriptive e. with | 1207    | mostly in Jun      | ridges, on old alluvium                | 1.1 - 6.1 | 5.2 | calcareous silt (loam 75% sand) |           |      |  |          | 25.9886                                   | 85.6879   | 59        |                                                                                                                                                                                                                                                                                                                                                                                                                                                                                                                                                                                                                                                                                                                                                              |                                                                                                                                                                                                                                                                                                                                                                                                                          |  |
| Howard, 1925           | Pusa, N Bihar, India, on the            | subtropical monsoon forest site | forest site                                 | evergreen broad-leaf  | tree       | Tree Jasmine          | <i>Millingtonia hortensis</i>  | 5.20  | exposure by           | descriptive e. with | 1207    | mostly in Jun      | ridges, on old alluvium                | 1.1 - 6.1 | 5.2 | calcareous silt (loam 75% sand) |           |      |  |          | 25.9886                                   | 85.6879   | 59        |                                                                                                                                                                                                                                                                                                                                                                                                                                                                                                                                                                                                                                                                                                                                                              |                                                                                                                                                                                                                                                                                                                                                                                                                          |  |
| Howard, 1925           | Pusa, N Bihar, India, on the            | subtropical monsoon forest site | forest site                                 | deciduous broad-leaf  | tree       | Indian lilac          | <i>Melia azadirachta</i>       | 4.00  | exposure by           | descriptive e. with | 1207    | mostly in Jun      | ridges, on old alluvium                | 1.1 - 6.1 | 5.2 | calcareous silt (loam 75% sand) |           |      |  |          | 25.9886                                   | 85.6879   | 59        |                                                                                                                                                                                                                                                                                                                                                                                                                                                                                                                                                                                                                                                                                                                                                              |                                                                                                                                                                                                                                                                                                                                                                                                                          |  |
| Howard, 1925           | Pusa, N Bihar, India, on the            | subtropical monsoon forest site | forest site                                 | evergreen broad-leaf  | tree       | Indian banyan         | <i>Ficus benghalensis</i>      | 4.90  | exposure by           | descriptive e. with | 1207    | mostly in Jun      | ridges, on old alluvium                | 1.1 - 6.1 | 5.2 | calcareous silt (loam 75% sand) |           |      |  |          | 25.9851                                   | 85.6912   | 59        | deep root repair observed                                                                                                                                                                                                                                                                                                                                                                                                                                                                                                                                                                                                                                                                                                                                    |                                                                                                                                                                                                                                                                                                                                                                                                                          |  |
| Howard, 1925           | Pusa, N Bihar, India, on the            | subtropical monsoon forest site | forest site                                 | semi-evergreen        | tree       | sacred fig            | <i>Ficus religiosa</i>         | 5.80  | exposure by           | descriptive e. with | 1207    | mostly in Jun      | ridges, on old alluvium                | 1.1 - 6.1 | 5.2 | calcareous silt (loam 75% sand) |           |      |  |          | 25.9851                                   | 85.6912   | 59        | deep root repair observed                                                                                                                                                                                                                                                                                                                                                                                                                                                                                                                                                                                                                                                                                                                                    |                                                                                                                                                                                                                                                                                                                                                                                                                          |  |
| Howard, 1925           | Pusa, N Bihar, India, on the            | subtropical monsoon forest site | forest site                                 | deciduous broad-leaf  | tree       | teak                  | <i>Tectona grandis</i>         | 4.00  | exposure by           | descriptive e. with | 1207    | mostly in Jun      | ridges, on old alluvium                | 1.1 - 6.1 | 5.2 | calcareous silt (loam 75% sand) |           |      |  |          | 25.9851                                   | 85.6912   | 59        | deep root repair observed                                                                                                                                                                                                                                                                                                                                                                                                                                                                                                                                                                                                                                                                                                                                    |                                                                                                                                                                                                                                                                                                                                                                                                                          |  |
| Howard, 1925           | Pusa, N Bihar, India, on the            | subtropical monsoon forest site | forest site                                 | deciduous broad-leaf  | tree       | Flame of the Forest   | <i>Butea frondosa</i>          | 5.20  | exposure by           | descriptive e. with | 1207    | mostly in Jun      | ridges, on old alluvium                | 1.1 - 6.1 | 5.2 | calcareous silt (loam 75% sand) |           |      |  |          | 25.9851                                   | 85.6912   | 59        | deep root repair observed                                                                                                                                                                                                                                                                                                                                                                                                                                                                                                                                                                                                                                                                                                                                    |                                                                                                                                                                                                                                                                                                                                                                                                                          |  |
| Hubble et al., 2010    | SW Western Australia, Victoria          | Mediterranean woodland          | Jewel cave                                  | evergreen broad-leaf  | tree       | Karri                 | <i>Eucalyptus diversicolor</i> | >20   | exposure by           | no                  |         |                    |                                        |           |     |                                 |           |      |  |          | -34.2739                                  | 115.0985  | 80        | We present our own evidence of Karri roots (if Eucalyptus diversicolor) at the site of the Australian River Red Gum E. camuldulensis which is common to the soil was wetted at least once in the caliche layer during the winter; the lone caliche layer during the winter; the long roots were found to be so nearly straight and vertical; Roots were found to be very abundant in the top 2 to 3 in of soil, becoming gradually sparser in the deeper layers. B. japonicus had a greater proportion of roots at the 8-14 dm depths than the others; Judging by the results of the first method, it is believed that all these data from the lithium method are less than we excavated three soil pits down to 1 m deep under closed canopy at each of the | location of Jewel cave found on GoogleEarth                                                                                                                                                                                                                                                                                                                                                                              |  |
| Hulbert, 1955          | Australia, Lewisiston, Nez Perce County | dry forest                      | semi-arid                                   | winter annual         | bunchgrass | cheatgrass            | <i>Bromus tectorum</i>         | >7    | soil pits, UCI tracer | yes                 | 381     | mostly in winter   | S-facing side of soil pits, UCI tracer |           |     | sand/silt loam                  | caliche   | 1.5  |  |          |                                           | -37.0306  | 145.1330  | 150                                                                                                                                                                                                                                                                                                                                                                                                                                                                                                                                                                                                                                                                                                                                                          |                                                                                                                                                                                                                                                                                                                                                                                                                          |  |
| Hulbert, 1955          | Australia, Lewisiston, Nez Perce County | dry forest                      | semi-arid                                   | winter annual         | bunchgrass | field brome           | <i>Bromus japonicus</i>        | 1.50  | soil pits, UCI tracer | yes                 | 381     | mostly in winter   | S-facing side of soil pits, UCI tracer |           |     | sand/silt loam                  | caliche   | 1.5  |  |          |                                           | 46.4378   | -117.0053 | 350                                                                                                                                                                                                                                                                                                                                                                                                                                                                                                                                                                                                                                                                                                                                                          |                                                                                                                                                                                                                                                                                                                                                                                                                          |  |
| Hulbert, 1955          | Australia, Lewisiston, Nez Perce County | dry forest                      | semi-arid                                   | annual / biennial     | grass      | meadow brome          | <i>Bromus commutatus</i>       | 1.50  | soil pits, UCI tracer | yes                 | 381     | mostly in winter   | S-facing side of soil pits, UCI tracer |           |     | sand/silt loam                  | caliche   | 1.5  |  |          |                                           | 46.4378   | -117.0053 | 350                                                                                                                                                                                                                                                                                                                                                                                                                                                                                                                                                                                                                                                                                                                                                          |                                                                                                                                                                                                                                                                                                                                                                                                                          |  |
| Hulbert, 1955          | Australia, Lewisiston, Nez Perce County | dry forest                      | semi-arid                                   | annual / biennial     | grass      | poverty brome         | <i>Bromus verticillatus</i>    | 1.50  | soil pits, UCI tracer | yes                 | 381     | mostly in winter   | S-facing side of soil pits, UCI tracer |           |     | sand/silt loam                  | caliche   | 1.5  |  |          |                                           | 46.4378   | -117.0053 | 350                                                                                                                                                                                                                                                                                                                                                                                                                                                                                                                                                                                                                                                                                                                                                          |                                                                                                                                                                                                                                                                                                                                                                                                                          |  |
| Hulbert, 1955          | Australia, Lewisiston, Nez Perce County | dry forest                      | semi-arid                                   | annual                | grass      | rattlesnake brome     | <i>Bromus setosus</i>          | 1.50  | soil pits, UCI tracer | yes                 | 381     | mostly in winter   | S-facing side of soil pits, UCI tracer |           |     | sand/silt loam                  | caliche   | 1.5  |  |          |                                           | 46.4378   | -117.0053 | 350                                                                                                                                                                                                                                                                                                                                                                                                                                                                                                                                                                                                                                                                                                                                                          |                                                                                                                                                                                                                                                                                                                                                                                                                          |  |
| Hulbert, 1955          | Australia, Lewisiston, Nez Perce County | dry forest                      | semi-arid                                   | annual                | grass      | bald brome            | <i>Bromus racemosus</i>        | 1.50  | soil pits, UCI tracer | yes                 | 381     | mostly in winter   | S-facing side of soil pits, UCI tracer |           |     | sand/silt loam                  | caliche   | 1.5  |  |          |                                           | 46.4378   | -117.0053 | 350                                                                                                                                                                                                                                                                                                                                                                                                                                                                                                                                                                                                                                                                                                                                                          |                                                                                                                                                                                                                                                                                                                                                                                                                          |  |
| Imai et al., 2010      | Malaysian Sabah                         | tropical rain forest            | lowland                                     | evergreen broad-leaf  | tree       | lowland Dipterocarp   | <i>Dipterocarp sp.</i>         | 1.10  | soil pits and core    | yes                 | 3500    | pronounced         | mean of 3 positions                    |           |     | Acrids poor in nutrients, well  |           |      |  |          | 3.5667                                    | -117.4167 | 156       |                                                                                                                                                                                                                                                                                                                                                                                                                                                                                                                                                                                                                                                                                                                                                              |                                                                                                                                                                                                                                                                                                                                                                                                                          |  |
| Jackson et al., 1999   | Cent-Eastern Edwards                    | savanna and woodland            | District Park                               | evergreen broad-leaf  | tree       | live oak              | <i>Quercus fusiformis</i>      | 5.00  | cave exposure         | no                  | 600-800 |                    | fractured Creataceous                  | <0.2      |     | 30.2137                         | -97.8630  | 241  |  |          |                                           |           |           |                                                                                                                                                                                                                                                                                                                                                                                                                                                                                                                                                                                                                                                                                                                                                              |                                                                                                                                                                                                                                                                                                                                                                                                                          |  |
| Jackson et al., 1999   | Cent-Eastern Edwards                    | savanna and woodland            | Seven Room Cave                             | deciduous broad-leaf  | tree       | Texas Cedar           | <i>Ulmus crassifolia</i>       | 5.00  | cave exposure         | no                  | 600-800 |                    | fractured Creataceous                  | <0.2      |     | 30.6707                         | -97.6907  | 232  |  |          |                                           |           |           |                                                                                                                                                                                                                                                                                                                                                                                                                                                                                                                                                                                                                                                                                                                                                              |                                                                                                                                                                                                                                                                                                                                                                                                                          |  |
| Jackson et al., 1999   | Cent-Eastern Edwards                    | savanna and woodland            | Pearson's Lost Cave                         | deciduous broad-leaf  | tree       | Sugar Hackberry       | <i>Lelisa laevigata</i>        | 6.00  | cave exposure         | no                  | 600-800 |                    | fractured Creataceous                  | <0.2      |     | 31.0443                         | -98.4895  | 414  |  |          |                                           |           |           |                                                                                                                                                                                                                                                                                                                                                                                                                                                                                                                                                                                                                                                                                                                                                              |                                                                                                                                                                                                                                                                                                                                                                                                                          |  |
| Jackson et al., 1999   | Cent-Eastern Edwards                    | savanna and woodland            | Pearson's Lost Cave                         | evergreen needle-leaf | tree       | Juniper               | <i>Juniper oshel</i>           | 6.00  | cave exposure         | no                  | 600-800 |                    | fractured Creataceous                  | <0.2      |     | 31.0443                         | -98.4895  | 414  |  |          |                                           |           |           |                                                                                                                                                                                                                                                                                                                                                                                                                                                                                                                                                                                                                                                                                                                                                              |                                                                                                                                                                                                                                                                                                                                                                                                                          |  |
| Jackson et al., 1999   | Cent-Eastern Edwards                    | savanna and woodland            | Spyglass Cave                               | evergreen broad-leaf  | tree       | live oak              | <i>Quercus fusiformis</i>      | 6.00  | cave exposure         | no                  | 600-800 |                    | fractured Creataceous                  | <0.2      |     | 30.2567                         | -97.7910  | 174  |  |          |                                           |           |           |                                                                                                                                                                                                                                                                                                                                                                                                                                                                                                                                                                                                                                                                                                                                                              |                                                                                                                                                                                                                                                                                                                                                                                                                          |  |
| Jackson et al., 1999   | Cent-Eastern Edwards                    | savanna and woodland            | Cotterell Cave                              | evergreen broad-leaf  | tree       | Ashe Juniper          | <i>Juniper oshel</i>           | 7.00  | cave exposure         | no                  | 600-800 |                    | fractured Creataceous                  | <0.2      |     | 30.3693                         | -97.7632  | 269  |  |          |                                           |           |           |                                                                                                                                                                                                                                                                                                                                                                                                                                                                                                                                                                                                                                                                                                                                                              |                                                                                                                                                                                                                                                                                                                                                                                                                          |  |
| Jackson et al., 1999   | Cent-Eastern Edwards                    | savanna and woodland            | Cotterell Cave                              | deciduous broad-leaf  | tree       | Durand oak            | <i>Quercus sinuata</i>         | 7.00  | cave exposure         | no                  | 600-800 |                    | fractured Creataceous                  | <0.2      |     | 30.3693                         | -97.7632  | 269  |  |          |                                           |           |           |                                                                                                                                                                                                                                                                                                                                                                                                                                                                                                                                                                                                                                                                                                                                                              |                                                                                                                                                                                                                                                                                                                                                                                                                          |  |
| Jackson et al., 1999   | Cent-Eastern Edwards                    | savanna and woodland            | Mystery Hole                                | deciduous broad-leaf  | tree       | Texas Cedar           | <i>Ulmus crassifolia</i>       | 7.00  | cave exposure         | no                  | 600-800 |                    | fractured Creataceous                  | <0.2      |     | 31.0298                         | -98.5063  | 424  |  |          |                                           |           |           |                                                                                                                                                                                                                                                                                                                                                                                                                                                                                                                                                                                                                                                                                                                                                              |                                                                                                                                                                                                                                                                                                                                                                                                                          |  |
| Jackson et al., 1999   | Cent-Eastern Edwards                    | savanna and woodland            | Sour Cave                                   | deciduous broad-leaf  | tree       | Texas Cedar           | <i>Ulmus americana</i>         | 7.00  | cave exposure         | no                  | 600-800 |                    | fractured Creataceous                  | <0.2      |     | 31.0393                         | -98.4800  | 409  |  |          |                                           |           |           |                                                                                                                                                                                                                                                                                                                                                                                                                                                                                                                                                                                                                                                                                                                                                              |                                                                                                                                                                                                                                                                                                                                                                                                                          |  |
| Jackson et al., 1999   | Cent-Eastern Edwards                    | savanna and woodland            | Sour Cave                                   | evergreen needle-leaf | tree       | Ashe Juniper          | <i>Juniper oshel</i>           | 7.00  | cave exposure         | no                  | 600-800 |                    | fractured Creataceous                  | <0.2      |     | 31.0393                         | -98.4800  | 409  |  |          |                                           |           |           |                                                                                                                                                                                                                                                                                                                                                                                                                                                                                                                                                                                                                                                                                                                                                              |                                                                                                                                                                                                                                                                                                                                                                                                                          |  |
| Jackson et al., 1999   | Cent-Eastern Edwards                    | savanna and woodland            | Thurtle Shell Cave                          | evergreen broad-leaf  | tree       | live oak              | <i>Quercus fusiformis</i>      | 8.00  | cave exposure         | no                  | 600-800 |                    | fractured Creataceous                  | <0.2      |     | 31.0422                         | -98.4805  | 403  |  |          |                                           |           |           |                                                                                                                                                                                                                                                                                                                                                                                                                                                                                                                                                                                                                                                                                                                                                              |                                                                                                                                                                                                                                                                                                                                                                                                                          |  |
| Jackson et al., 1999   | Cent-Eastern Edwards                    | savanna and woodland            | Cave of Many Names                          | deciduous broad-leaf  | tree       | Texas Cedar           | <i>Ulmus crassifolia</i>       | 9.00  | cave exposure         | no                  | 600-800 |                    | fractured Creataceous                  | <0.2      |     | 31.0420                         | -98.5052  | 428  |  |          |                                           |           |           |                                                                                                                                                                                                                                                                                                                                                                                                                                                                                                                                                                                                                                                                                                                                                              |                                                                                                                                                                                                                                                                                                                                                                                                                          |  |
| Jackson et al., 1999   | Cent-Eastern Edwards                    | savanna and woodland            | Natural Bridge (south)                      | evergreen broad-leaf  | tree       | live oak              | <i>Quercus fusiformis</i>      | 9.00  | cave exposure         | no                  | 600-800 |                    | fractured Creataceous                  | <0.2      |     | 29.6920                         | -98.3417  | 316  |  |          |                                           |           |           |                                                                                                                                                                                                                                                                                                                                                                                                                                                                                                                                                                                                                                                                                                                                                              |                                                                                                                                                                                                                                                                                                                                                                                                                          |  |
| Jackson et al., 1999   | Cent-Eastern Edwards                    | savanna and woodland            | Sweet Cave                                  | evergreen broad-leaf  | tree       | live oak              | <i>Quercus fusiformis</i>      | 11.00 | cave exposure         | no                  | 600-800 |                    | fractured Creataceous                  | <0.2      |     | 31.0395                         | -98.4808  | 410  |  |          |                                           |           |           |                                                                                                                                                                                                                                                                                                                                                                                                                                                                                                                                                                                                                                                                                                                                                              |                                                                                                                                                                                                                                                                                                                                                                                                                          |  |
| Jackson et al., 1999   | Cent-Eastern Edwards                    | savanna and woodland            | Cicurina Cave                               | evergreen broad-leaf  | tree       | live oak              | <i>Quercus fusiformis</i>      | 14.00 | cave exposure         | no                  | 600-800 |                    | fractured Creataceous                  | <0.2      |     | 31.0472                         | -98.5042  | 404  |  |          |                                           |           |           |                                                                                                                                                                                                                                                                                                                                                                                                                                                                                                                                                                                                                                                                                                                                                              |                                                                                                                                                                                                                                                                                                                                                                                                                          |  |
| Jackson et al., 1999   | Cent-Eastern Edwards                    | savanna and woodland            | Powell's Cave                               | evergreen broad-leaf  | tree       | live oak              | <i>Quercus fusiformis</i>      | 18.00 | cave exposure         | no                  | 600-800 |                    | fractured Creataceous                  | <0.2      |     | 30.9282                         | -99.9155  | 627  |  |          |                                           |           |           |                                                                                                                                                                                                                                                                                                                                                                                                                                                                                                                                                                                                                                                                                                                                                              |                                                                                                                                                                                                                                                                                                                                                                                                                          |  |
| Jackson et al., 1999   | Cent-Eastern Edwards                    | savanna and woodland            | Honey Creek Cave                            | evergreen broad-leaf  | tree       | live oak              | <i>Quercus fusiformis</i>      | 22.00 | cave exposure         | no                  | 600-800 |                    | fractured Creataceous                  | <0.2      |     | 29.8353                         | -98.5192  | 403  |  |          |                                           |           |           |                                                                                                                                                                                                                                                                                                                                                                                                                                                                                                                                                                                                                                                                                                                                                              |                                                                                                                                                                                                                                                                                                                                                                                                                          |  |
| Jackson et al., 2002   | Jornada, NM                             | savanna and woodland            | grass patch                                 | perennial             | grass      | Black Grama           | <i>Bouteloua eriopoda</i>      | 1.70  | soil coring           | yes                 | 230     |                    |                                        |           |     | 32.4966                         | -106.7848 | 1376 |  |          |                                           |           |           |                                                                                                                                                                                                                                                                                                                                                                                                                                                                                                                                                                                                                                                                                                                                                              |                                                                                                                                                                                                                                                                                                                                                                                                                          |  |
| Jackson et al., 2002   | Jornada, NM                             | savanna and woodland            | woody stand                                 | evergreen broad-leaf  | tree       | mesquite, creosote    | <i>Prosopis juliflora</i>      | 5.40  | soil coring           | yes                 | 230     |                    |                                        |           |     | 32.4965                         | -106.7847 | 1376 |  |          |                                           |           |           |                                                                                                                                                                                                                                                                                                                                                                                                                                                                                                                                                                                                                                                                                                                                                              |                                                                                                                                                                                                                                                                                                                                                                                                                          |  |
| Jackson et al., 2002   | Sevilleta, NM                           | savanna and woodland            | grass patch                                 | perennial             | grass      | Black Grama           | <i>Bouteloua eriopoda</i>      | 0.60  | soil coring           | yes                 | 277     |                    |                                        |           |     | 34.2694                         | -106.7383 | 1582 |  |          |                                           |           |           |                                                                                                                                                                                                                                                                                                                                                                                                                                                                                                                                                                                                                                                                                                                                                              |                                                                                                                                                                                                                                                                                                                                                                                                                          |  |
| Jackson et al., 2002   | Sevilleta, NM                           | savanna and woodland            | woody stand                                 | evergreen broad-leaf  | tree       | mesquite, creosote    | <i>Prosopis juliflora</i>      | 2.00  | soil coring           | yes                 | 277     |                    |                                        |           |     | 34.2694                         | -106.7383 | 1583 |  |          |                                           |           |           |                                                                                                                                                                                                                                                                                                                                                                                                                                                                                                                                                                                                                                                                                                                                                              |                                                                                                                                                                                                                                                                                                                                                                                                                          |  |
| Jackson et al., 2002   | Central Plains Experimental             | savanna and woodland            | grass patch                                 | perennial             | grass      | Blue grama            | <i>Bouteloua gracilis</i>      | 0.90  | soil coring           | yes                 | 322     |                    |                                        |           |     | 40.8853                         | -104.6948 | 1669 |  |          |                                           |           |           |                                                                                                                                                                                                                                                                                                                                                                                                                                                                                                                                                                                                                                                                                                                                                              |                                                                                                                                                                                                                                                                                                                                                                                                                          |  |
| Jackson et al., 2002   | Central Plains Experimental             | savanna and woodland            | woody stand                                 | evergreen broad-leaf  | tree       | mesquite, creosote    | <i>Prosopis juliflora</i>      | 4.00  | soil coring           | yes                 | 322     |                    |                                        |           |     | 40.8852                         | -104.6948 | 1669 |  |          |                                           |           |           |                                                                                                                                                                                                                                                                                                                                                                                                                                                                                                                                                                                                                                                                                                                                                              |                                                                                                                                                                                                                                                                                                                                                                                                                          |  |
| Jackson et al., 2002   | Central Plains Experimental             | savanna and woodland            | grass patch                                 | perennial             | grass      | feather grass         | <i>Stipa sp.</i>               | 0.90  | soil coring           | yes                 | 660     |                    |                                        |           |     | 33.8993                         | -99.3993  | 376  |  |          |                                           |           |           |                                                                                                                                                                                                                                                                                                                                                                                                                                                                                                                                                                                                                                                                                                                                                              |                                                                                                                                                                                                                                                                                                                                                                                                                          |  |
| Jackson et al., 2002   | Vernon, TX                              | savanna and woodland            | woody stand                                 | evergreen broad-leaf  | tree       | mesquite, creosote    | <i>Prosopis juliflora</i>      | 5.80  | soil coring           | yes                 | 660     |                    |                                        |           |     | 33.9005                         | -99.3984  | 374  |  |          |                                           |           |           |                                                                                                                                                                                                                                                                                                                                                                                                                                                                                                                                                                                                                                                                                                                                                              |                                                                                                                                                                                                                                                                                                                                                                                                                          |  |
| Jackson et al., 2002   | Riesel, TX                              | savanna and woodland            | grass patch                                 | perennial             | grass      | little bluestem       | <i>Schizachyrium scoparium</i> | 0.80  | soil coring           | yes                 | 840     |                    |                                        |           |     | 31.4995                         | -96.6010  | 146  |  |          |                                           |           |           |                                                                                                                                                                                                                                                                                                                                                                                                                                                                                                                                                                                                                                                                                                                                                              |                                                                                                                                                                                                                                                                                                                                                                                                                          |  |
| Jackson et al., 2002   | Riesel, TX                              | savanna and woodland            | woody stand                                 | evergreen broad-leaf  | tree       | mesquite, creosote    | <i>Prosopis juliflora</i>      | 2.80  | soil coring           | yes                 | 840     |                    |                                        |           |     | 31.4997                         | -96.6008  | 146  |  |          |                                           |           |           |                                                                                                                                                                                                                                                                                                                                                                                                                                                                                                                                                                                                                                                                                                                                                              |                                                                                                                                                                                                                                                                                                                                                                                                                          |  |
| Jackson et al., 2002   | Engelting, TX                           | savanna and woodland            | grass patch                                 | perennial             | grass      | beard grass, bluestem | <i>Andropogon sp.</i>          | 3.30  | soil coring           | yes                 | 1070    |                    |                                        |           |     | 31.9001                         | -95.8994  | 109  |  |          |                                           |           |           |                                                                                                                                                                                                                                                                                                                                                                                                                                                                                                                                                                                                                                                                                                                                                              |                                                                                                                                                                                                                                                                                                                                                                                                                          |  |
| Jackson et al., 2002   | Engelting, TX                           | savanna and woodland            | woody stand                                 | evergreen broad-leaf  | tree       | mesquite, creosote    | <i>Prosopis juliflora</i>      | 2.50  | soil coring           | yes                 | 1070    |                    |                                        |           |     | 31.8999                         | -95.9001  | 107  |  |          |                                           |           |           |                                                                                                                                                                                                                                                                                                                                                                                                                                                                                                                                                                                                                                                                                                                                                              |                                                                                                                                                                                                                                                                                                                                                                                                                          |  |
| Jaramello et al., 2003 | Tuxtias, SE Mexico                      | tropical rainforest             | Primary Forests (3 Pastures (12, 20, 28) r) | evergreen broad-leaf  | tree       |                       | <i>Nectandra ambigua</i>       | 2.00  | soil pits and coring  | yes                 | > 4000  | Mar-May < 150mm/mo |                                        |           |     | well-drained, coarse-textured   |           |      |  |          | undisturbed recovering forest after clear | 18.5833   | -95.0833  | 333                                                                                                                                                                                                                                                                                                                                                                                                                                                                                                                                                                                                                                                                                                                                                          |                                                                                                                                                                                                                                                                                                                                                                                                                          |  |
| Jaramello et al., 2003 | Tuxtias, SE Mexico                      | tropical rainforest             | Primary Forests (3 Pastures (12, 20, 28) r) | evergreen broad-leaf  | tree       |                       | <i>Panicum maximum</i>         | 1.10  | soil pits and coring  | yes                 | > 4000  | Mar-May < 150mm/mo |                                        |           |     | coarse-textured                 |           |      |  |          |                                           | 18.5488   | -95.0546  | 78                                                                                                                                                                                                                                                                                                                                                                                                                                                                                                                                                                                                                                                                                                                                                           |                                                                                                                                                                                                                                                                                                                                                                                                                          |  |
| Jaramello et al., 2003 | Tuxtias, SE Mexico                      | tropical rainforest             | Primary Forests (3 Pastures (12, 20, 28) r) | perennial             | grass      |                       | <i>Conyolium</i>               | 0.90  | soil pits and coring  | yes                 | > 4000  | Mar-May < 150mm/mo |                                        |           |     | coarse-textured                 |           |      |  |          |                                           | 18.5408   | -95.1036  | 613                                                                                                                                                                                                                                                                                                                                                                                                                                                                                                                                                                                                                                                                                                                                                          |                                                                                                                                                                                                                                                                                                                                                                                                                          |  |















[illegible]



|                            |                                   |                                         |                       |            |                            |                                    |       |                      |              |      |                       |      |                                      |                                                         |                     |                    |         |                       |                      |           |           |                                                                                                                                                                                                              |                                                                                                                                                                                                                                                                                       |                                                                                                                             |
|----------------------------|-----------------------------------|-----------------------------------------|-----------------------|------------|----------------------------|------------------------------------|-------|----------------------|--------------|------|-----------------------|------|--------------------------------------|---------------------------------------------------------|---------------------|--------------------|---------|-----------------------|----------------------|-----------|-----------|--------------------------------------------------------------------------------------------------------------------------------------------------------------------------------------------------------------|---------------------------------------------------------------------------------------------------------------------------------------------------------------------------------------------------------------------------------------------------------------------------------------|-----------------------------------------------------------------------------------------------------------------------------|
| van Rees & Comerford, 1989 | 7km NE of Gainesville, FL         | subtropical mixed forest                | evergreen needle-leaf | tree       | slash pine                 | <i>Pinus elliotii</i>              | 3.30  | coring, trench       | yes          | 1330 |                       |      | on flat coastal plain                | sandy spodosol, poorly drained                          | argillic horizon    | 0.8-1.3            |         |                       | 20yr old plantation  | 29.7046   | -82.2546  | 53                                                                                                                                                                                                           | Slash pine taproots extended between 200 and 330 cm below the surface. (i.e. 1-2.3 m)                                                                                                                                                                                                 | Comparing the vertical root distribution of pine and palmetto showed that both were deep, extensive rooting species. It was |
| van Rees & Comerford, 1989 | Gainesville, FL                   | subtropical mixed forest                | evergreen needle-leaf | small palm | saw palmetto               | <i>Serenoa repens</i>              | 2.05  | coring, trench       | yes          | 1330 |                       |      | on flat coastal plain                | sandy spodosol, poorly drained                          | argillic horizon    | 0.8-1.3            |         |                       | 20yr old plantation  | 29.7046   | -82.2546  | 53                                                                                                                                                                                                           | Pine roots frequently grew inside large diameter (3-5 mm), dead roots of vertical soil profiles showed that these latter horizons usually prevent Douglas fir                                                                                                                         |                                                                                                                             |
| Reynolds & Fralley, 1989   | E of Idaho Falls, ID              | semi-arid shrub-steppe                  | undisturbed site      | shrub      | big sagebrush              | <i>Artemisia tridentata</i>        | 1.40  | coring               | yes          | 224  | 35% in Apr-Jun        |      | SE facing 1/18 slope                 | coarse sand to sandy loam 2m                            | clayey silt         |                    |         |                       | 51.711               | -1.2534   | 99        |                                                                                                                                                                                                              |                                                                                                                                                                                                                                                                                       |                                                                                                                             |
| Reynolds & Fralley, 1989   | E of Idaho Falls, ID              | semi-arid shrub-steppe                  | disturbed site        | shrub      | big sagebrush              | <i>Artemisia tridentata</i>        | 2.50  | 32P radio tracer     | yes          | 224  | 35% in Apr-Jun        |      |                                      | aeolian sandy loam and loess                            |                     |                    |         |                       | 43.8194              | -112.8235 | 1465      |                                                                                                                                                                                                              |                                                                                                                                                                                                                                                                                       |                                                                                                                             |
| Reynolds & Fralley, 1989   | E of Idaho Falls, ID              | semi-arid shrub-steppe                  | undisturbed site      | perennial  | yellow rabbitbrush         | <i>Chrysothamnus viscidiflorus</i> | 1.90  | 32P radio tracer     | yes          | 224  | 35% in Apr-Jun        |      |                                      | clayey silt                                             |                     |                    |         |                       | 43.8194              | -112.8235 | 1465      | Root depth and lateral spread were determined for five plant species using radiotracer techniques. Depth data only were collected from two additional species                                                | locations guessed to be within the INEL facilities/lands, one at a disturbed site (Test Area North), the other at an undisturbed site to the south at a comparable elevation                                                                                                          |                                                                                                                             |
| Reynolds & Fralley, 1989   | E of Idaho Falls, ID              | semi-arid shrub-steppe                  | disturbed site        | perennial  | grass                      | <i>Leymus cinereus</i>             | > 1.6 | 32P radio tracer     | yes          | 224  | 35% in Apr-Jun        |      |                                      | clayey silt                                             |                     |                    |         |                       | 43.8194              | -112.8235 | 1465      | Big sagebrush ( <i>Artemisia tridentata</i> ), the deepest rooted species examined, had roots extending to a depth of 225 cm.                                                                                |                                                                                                                                                                                                                                                                                       |                                                                                                                             |
| Reynolds & Fralley, 1989   | E of Idaho Falls, ID              | semi-arid shrub-steppe                  | undisturbed site      | perennial  | grass                      | <i>Leymus cinereus</i>             | > 2.0 | 32P radio tracer     | yes          | 224  | 35% in Apr-Jun        |      |                                      | aeolian sandy loam and loess                            |                     |                    |         |                       | 43.8542              | -112.7309 | 1459      | Roots of Great Basin wildrye ( <i>Leymus cinereus</i> ), the deepest rooted grass, were detected to 200 cm. The maximum lateral spread of both of these species was 100 cm and occurred at a depth of 40 cm. |                                                                                                                                                                                                                                                                                       |                                                                                                                             |
| Reynolds & Fralley, 1989   | E of Idaho Falls, ID              | semi-arid shrub-steppe                  | undisturbed site      | annual     | forb                       | <i>Cordylanthus ramosus</i>        | 1.60  | 32P radio tracer     | yes          | 224  | 35% in Apr-Jun        |      |                                      | clayey silt                                             |                     |                    |         |                       | 43.8194              | -112.8235 | 1465      |                                                                                                                                                                                                              |                                                                                                                                                                                                                                                                                       |                                                                                                                             |
| Reynolds & Fralley, 1989   | E of Idaho Falls, ID              | semi-arid shrub-steppe                  | disturbed site        | perennial  | grass                      | <i>Oryzopsis hymenoides</i>        | > 1.5 | 32P radio tracer     | yes          | 224  | 35% in Apr-Jun        |      |                                      | aeolian sandy loam and loess                            |                     |                    |         |                       | 43.8542              | -112.7309 | 1459      |                                                                                                                                                                                                              |                                                                                                                                                                                                                                                                                       |                                                                                                                             |
| Reynolds & Fralley, 1989   | E of Idaho Falls, ID              | semi-arid shrub-steppe                  | disturbed site        | perennial  | grass                      | <i>Agropyron cristatum</i>         | > 1.5 | 32P radio tracer     | yes          | 224  | 35% in Apr-Jun        |      |                                      | aeolian sandy loam and loess                            |                     |                    |         |                       | 43.8542              | -112.7309 | 1459      |                                                                                                                                                                                                              |                                                                                                                                                                                                                                                                                       |                                                                                                                             |
| Restom & Nardstad, 1994    | Paragominas, Para, Brazil         | tropical rainforest                     | evergreen broad-leaf  | liana      |                            | <i>Davilla kunthii</i>             | 10.00 | excavatio            | n            | 1800 | dry in June-Nov       |      | upland                               | Oxisol: 70-80% clay, 10-20% gravelly loam to sandy loam |                     |                    |         | secondary forest from | -2.9837              | -47.4153  | 132       | The deepest individual excavated had roots as deep as 10 m. Deep routine was shown                                                                                                                           | moved from given lat-lon to a forested area 7km NE of                                                                                                                                                                                                                                 |                                                                                                                             |
| Richards & Gulderson, 1987 | Logan, Utah                       | semi-arid shrub-steppe                  | evergreen needle-leaf | shrub      | big sagebrush              | <i>Artemisia tridentata</i>        | 2.50  | excavatio            | n            | 468  |                       |      | sandy loam developed on well drained |                                                         |                     |                    |         |                       |                      | 41.7536   | -123.8000 | 1460                                                                                                                                                                                                         | The soil water potential data and experimental results suggest that at night, deeply rooted, with pine roots observed at 4-meter depths. The hydrologic routine                                                                                                                       | was rooting depth taken as 2.5 because the profile excluded lat-lon determined from Google Earth search for Calhoun         |
| Richter & Markewitz, 1994  | near Cincinnati, OH               | temperate deciduous                     | evergreen needle-leaf | tree       | tobolopy pine              | <i>Pinus taeda</i>                 | 4.00  | soil sampling        | no           | 1250 |                       |      | excavatio                            | on 30-degree                                            |                     |                    |         |                       |                      | 34.6374   | -81.6630  | 150                                                                                                                                                                                                          |                                                                                                                                                                                                                                                                                       | From Fig 11                                                                                                                 |
| Riesterberg, 1994          | near Cincinnati, OH               | temperate deciduous                     | evergreen needle-leaf | tree       | sugar maple                | <i>Acer saccharum</i>              | 1.00  | excavatio            | n + trench   |      |                       |      | excavatio                            | on 30-degree                                            | limestone and shale |                    | 0.5     |                       |                      | 39.1012   | -84.6650  | 227                                                                                                                                                                                                          |                                                                                                                                                                                                                                                                                       | From Fig 11                                                                                                                 |
| Riesterberg, 1994          | near Cincinnati, OH               | temperate deciduous                     | evergreen needle-leaf | tree       | white ash                  | <i>Fraxinus americana L.</i>       | > 2.0 | excavatio            | n + trench   |      |                       |      | excavatio                            | on 30-degree                                            | limestone and shale |                    | 0.5     |                       |                      | 39.1012   | -84.6650  | 227                                                                                                                                                                                                          | Few roots larger than 1 cm in diameter extend through soil 2 m below the ground                                                                                                                                                                                                       | From Fig 18                                                                                                                 |
| Riesterberg, 1994          | near Cincinnati, OH               | temperate deciduous                     | evergreen needle-leaf | tree       | juniper                    | <i>Juniperus sp.</i>               | 1.00  | excavatio            | n + trench   |      |                       |      | excavatio                            | on 30-degree                                            | limestone and shale |                    | 0.5     |                       |                      | 39.1012   | -84.6650  | 227                                                                                                                                                                                                          |                                                                                                                                                                                                                                                                                       | from Fig 18                                                                                                                 |
| Riesterberg, 1994          | near Cincinnati, OH               | temperate deciduous                     | evergreen needle-leaf | tree       | sugar maple                | <i>Acer saccharum</i>              | > 0.6 | excavatio            | n            |      |                       |      | excavatio                            | on 8-degree                                             | limestone and shale |                    | 1.5     |                       |                      | 39.1854   | -84.5305  | 203                                                                                                                                                                                                          | has a similar shallow rooting habit, even though it grew in deeper colluvium than the branches extend to a depth of 1 m below the ground surface and then                                                                                                                             | from Fig 12 and author notes                                                                                                |
| Riesterberg, 1994          | near Cincinnati, OH               | temperate deciduous                     | evergreen needle-leaf | tree       | white ash                  | <i>Fraxinus americana L.</i>       | > 1.1 | excavatio            | n            |      |                       |      | excavatio                            | on 8-degree                                             | limestone and shale |                    | 1.5     |                       |                      | 39.1854   | -84.5305  | 203                                                                                                                                                                                                          | The branches extend to a depth of 1 m below the ground surface and then                                                                                                                                                                                                               | from Fig 13 and author notes                                                                                                |
| Roberts & Hertz, 1934      | Poughkeepsie, NY                  | broadleaf                               | perennial             | forb       | ground pine, (rhizomatous) | <i>Lycopodium complanatum</i>      | 0.13  | excavatio            | n            |      |                       |      | excavatio                            | on 8-degree                                             |                     |                    |         |                       |                      | 41.6730   | -73.9358  | 42                                                                                                                                                                                                           | The root system is extensive, one main root and its branches occupying an area                                                                                                                                                                                                        | Lab study - no site. The authors are from VASSAR COLLEGE                                                                    |
| Robinson et al., 2006      | Western an                        | Mediterranean                           | evergreen broad-leaf  | tree       | Blue mallee                | <i>Eucalyptus polybractea</i>      | 8.00  | soil drying inferred | no           | 311  | summer drought        | 2542 | upper slope                          | uniform sand over silcrete                              | silcrete hardpan    | 8                  |         |                       | tree belts to reduce | -30.1680  | -117.3701 | 343                                                                                                                                                                                                          | depth of drilling 8m                                                                                                                                                                                                                                                                  | rooting depth inferred from soil depth dried to wilting point                                                               |
| Robinson et al., 2006      | Western an                        | Mediterranean                           | evergreen broad-leaf  | tree       | Blue mallee                | <i>Eucalyptus polybractea</i>      | 2.00  | soil drying inferred | no           | 311  | summer drought        | 2542 | middle slope                         | uniform sand over silcrete                              | silcrete hardpan    | 2                  |         |                       | tree belts to reduce | -30.1851  | -117.3679 | 320                                                                                                                                                                                                          | depth of drilling 2m                                                                                                                                                                                                                                                                  | rooting depth inferred from soil depth dried to wilting point                                                               |
| Robinson et al., 2006      | Western an                        | Mediterranean                           | evergreen broad-leaf  | tree       | Blue mallee                | <i>Eucalyptus polybractea</i>      | 5.00  | soil drying inferred | no           | 334  | summer drought        | 2169 |                                      | 1m gravelly sandy loam, on                              |                     | granite            | 4       |                       | tree belts to reduce | -31.9535  | -118.5244 | 362                                                                                                                                                                                                          | depth of drilling 5m                                                                                                                                                                                                                                                                  | rooting depth inferred from soil depth dried to wilting point                                                               |
| Robinson et al., 2006      | Western an                        | Mediterranean                           | evergreen broad-leaf  | tree       | York gum                   | <i>Eucalyptus laevis</i>           | 2.00  | soil drying inferred | no           | 334  | summer drought        | 2169 |                                      | 1m gravelly sandy loam, on                              |                     | granite            | 4       |                       | tree belts to reduce | -32.0963  | -118.5539 | 300                                                                                                                                                                                                          | depth of drilling 2m                                                                                                                                                                                                                                                                  | rooting depth inferred from soil depth dried to wilting point                                                               |
| Robinson et al., 2006      | Western an                        | Mediterranean                           | evergreen broad-leaf  | tree       | oil mallee                 | <i>Eucalyptus kochii ssp.</i>      | 9.00  | soil drying inferred | no           | 507  | summer drought        | 1590 |                                      | 0.25-0.6m sandy ferricrete gravel                       |                     | pallid zone        | 1.0-2.0 |                       | tree belts to reduce | -32.9998  | -117.1760 | 364                                                                                                                                                                                                          | depth of drilling 10m                                                                                                                                                                                                                                                                 | rooting depth inferred from soil depth dried to wilting point                                                               |
| Robinson et al., 2006      | Western an                        | Mediterranean                           | evergreen broad-leaf  | tree       | brown mallee               | <i>Eucalyptus polybractea</i>      | 4.00  | soil drying inferred | no           | 507  | summer drought        | 1590 |                                      | 0.5m gravelly sandy on clay                             |                     | pallid zone        | 1.0-2.0 |                       | tree belts to reduce | -32.9932  | -117.1696 | 336                                                                                                                                                                                                          | depth of drilling 6m                                                                                                                                                                                                                                                                  | rooting depth inferred from soil depth dried to wilting point                                                               |
| Robinson et al., 2006      | Western an                        | Mediterranean                           | evergreen broad-leaf  | tree       | York gum                   | <i>Eucalyptus horistes</i>         | 10.00 | soil drying inferred | no           | 411  | summer drought        | 1826 |                                      | 0.25-0.6m sandy ferricrete gravel                       |                     | pallid zone        | 1.0-2.0 |                       | tree belts to reduce | -32.8787  | -117.5699 | 336                                                                                                                                                                                                          | depth of drilling 10m                                                                                                                                                                                                                                                                 | rooting depth inferred from soil depth dried to wilting point                                                               |
| Robinson et al., 2006      | Western an                        | Mediterranean                           | evergreen broad-leaf  | tree       | oil mallee                 | <i>Eucalyptus kochii ssp.</i>      | 8.00  | soil drying inferred | no           | 490  | summer drought        | 1608 |                                      | 0.25-0.6m sandy ferricrete gravel                       |                     | pallid zone        | 1.0-2.0 |                       | tree belts to reduce | -33.6175  | -117.2206 | 290                                                                                                                                                                                                          | depth of drilling 8m                                                                                                                                                                                                                                                                  | rooting depth inferred from soil depth dried to wilting point                                                               |
| Robinson et al., 2006      | Western an                        | Mediterranean                           | evergreen broad-leaf  | tree       | oil mallee                 | <i>Eucalyptus kochii ssp.</i>      | 7.75  | soil drying inferred | no           | 356  | summer drought        | 1933 |                                      | 0.15m clay sand on 0.5-0.7m                             |                     |                    |         |                       | tree belts to reduce | -33.1028  | -118.7969 | 358                                                                                                                                                                                                          | depth of drilling 10m                                                                                                                                                                                                                                                                 | rooting depth inferred from soil depth dried to wilting point                                                               |
| Roering et al., 2002       | S. Island, New Zealand            | Subtropical moist forest                | evergreen broad-leaf  | tree       | southern beech             | <i>Nothofagus</i>                  | 0.50  | soil sampling        | no           |      |                       |      | slope of alluvial slope of alluvial  | tephra on loess                                         |                     |                    |         |                       |                      | -42.4508  | -173.3584 | 360                                                                                                                                                                                                          | The transition from a thin, highly concentrated tephra layer at depth to less concentrated, widely distributed tephra in the upper soil may result from soil mixing                                                                                                                   | Fig 3a indicates site elevation of 397.392m, but the map given suggests a location at the 360m elevation range              |
| Roering et al., 2002       | S. Island, New Zealand            | Subtropical moist forest                | evergreen broad-leaf  | tree       | podocarp                   | <i>Podocarpus</i>                  | 0.50  | soil sampling        | no           |      |                       |      | slope of alluvial slope of alluvial  | tephra on loess                                         |                     |                    |         |                       |                      | -42.4508  | -173.3584 | 360                                                                                                                                                                                                          |                                                                                                                                                                                                                                                                                       |                                                                                                                             |
| Rood et al., 2011          | British Columbia                  | forest                                  | deciduous broad-leaf  | tree       | black cottonwood           | <i>Populus trichocarpa</i>         | 0.65  | river-cut banks      | yes + photos |      |                       |      | 1.5                                  |                                                         |                     |                    |         |                       |                      | 49.5617   | -114.9858 | 1134                                                                                                                                                                                                         | The floodplain forests were dominated by cottonwoods and from mountain to prairie                                                                                                                                                                                                     |                                                                                                                             |
| Rood et al., 2011          | British Columbia                  | forest                                  | deciduous broad-leaf  | tree       | prairie cottonwood         | <i>Populus deltoides</i>           | 1.35  | river-cut banks      | yes + photos |      |                       |      | 1.55                                 |                                                         |                     |                    |         |                       |                      | 49.6158   | -112.9014 | 840                                                                                                                                                                                                          |                                                                                                                                                                                                                                                                                       |                                                                                                                             |
| Rood et al., 2011          | British Columbia                  | forest                                  | deciduous broad-leaf  | tree       | balsam poplar              | <i>Populus balsamifera</i>         | 1.25  | river-cut banks      | yes + photos |      |                       |      |                                      |                                                         |                     |                    |         |                       |                      | 50.8103   | -113.5206 | 921                                                                                                                                                                                                          |                                                                                                                                                                                                                                                                                       |                                                                                                                             |
| Rood et al., 2011          | British Columbia                  | forest                                  | deciduous broad-leaf  | tree       | balsam poplar              | <i>Populus balsamifera</i>         | 0.90  | river-cut banks      | yes + photos |      |                       |      |                                      |                                                         |                     |                    |         |                       |                      | 50.8103   | -113.5206 | 921                                                                                                                                                                                                          | lat-lon very precise - pinpoint river banks; water table location (or stream surface) was only give for 2 sites in Fig. 1; Great data and photos showing shallow rooting with shallow WTD and dimorphic rooting with deep WTD - water table serves to confine or entice deeper roots. |                                                                                                                             |
| Rood et al., 2011          | British Columbia                  | forest                                  | deciduous broad-leaf  | tree       | white spruce               | <i>Picea glauca</i>                | 0.40  | river-cut banks      | yes + photos |      |                       |      | 1.5                                  |                                                         |                     |                    |         |                       |                      | 49.5617   | -114.9858 | 1134                                                                                                                                                                                                         |                                                                                                                                                                                                                                                                                       |                                                                                                                             |
| Rood et al., 2011          | British Columbia                  | forest                                  | deciduous broad-leaf  | tree       | trembling aspen            | <i>Populus tremuloides</i>         | 0.30  | river-cut banks      | yes + photos |      |                       |      |                                      |                                                         |                     |                    |         |                       |                      | 50.8103   | -113.5206 | 921                                                                                                                                                                                                          |                                                                                                                                                                                                                                                                                       |                                                                                                                             |
| Rood et al., 2011          | British Columbia                  | forest                                  | deciduous broad-leaf  | tree       | narrowleaf cottonwood      | <i>Populus angustifolia</i>        | 1.40  | river-cut banks      | yes + photos |      |                       |      |                                      |                                                         |                     |                    |         |                       |                      | 49.6767   | -112.8528 | 441                                                                                                                                                                                                          |                                                                                                                                                                                                                                                                                       |                                                                                                                             |
| Rood et al., 2011          | British Columbia                  | forest                                  | deciduous broad-leaf  | tree       | narrowleaf cottonwood      | <i>Populus angustifolia</i>        | 0.75  | river-cut banks      | yes + photos |      |                       |      |                                      |                                                         |                     |                    |         |                       |                      | 49.5047   | -113.3228 | 980                                                                                                                                                                                                          |                                                                                                                                                                                                                                                                                       |                                                                                                                             |
| Rood et al., 2011          | British Columbia                  | forest                                  | deciduous broad-leaf  | tree       | narrowleaf cottonwood      | <i>Populus angustifolia</i>        | 1.15  | river-cut banks      | yes + photos |      |                       |      |                                      |                                                         |                     |                    |         |                       |                      | 49.5025   | -114.0506 | 1148                                                                                                                                                                                                         |                                                                                                                                                                                                                                                                                       |                                                                                                                             |
| Rose et al., 2003          | Southern Sierras, CA              | Mediterranean woodland                  | evergreen needle-leaf | tree       | Jeffrey pine               | <i>Pinus jeffreyi</i>              | 3.75  | soil/rock sampling   | no           | 760  | mostly as snow in Nov |      | NE-facing footslope                  | coarse loamy                                            |                     | granite, fractured | 0.75    |                       |                      | 35.9690   | -118.6296 | 157                                                                                                                                                                                                          | Roots were distributed through the weathered rock, down to a depth of 7 m.                                                                                                                                                                                                            | same site as Hubbard et al 2001                                                                                             |
| Rose et al., 2003          | Southern Sierras, CA              | Mediterranean woodland                  | evergreen needle-leaf | shrub      | greeneale                  | <i>Arctostaphylos</i>              | 2.00  | soil/rock sampling   | no           | 760  | mostly as snow in Nov |      | NE-facing footslope                  | coarse loamy                                            |                     | granite, fractured | 0.75    |                       |                      | 35.9690   | -118.6296 | 157                                                                                                                                                                                                          |                                                                                                                                                                                                                                                                                       | Isotope data shows root uptake above 2m                                                                                     |
| Rouppard et al., 1999      | Burkina Faso, west Africa         | Sahel                                   | deciduous broad-leaf  | tree       | Acacia albida              | <i>Faidherbia albida</i>           | 7.25  | trench wall          | yes          | 924  | Oct-Mar               | 2100 | flat hilltop                         | clay sand, on clay silt, on silt,                       |                     | sedimentary        | 4.5     |                       |                      | 11.4336   | -3.4006   | 354                                                                                                                                                                                                          | Roots were distributed through the weathered rock, down to a depth of 7 m.                                                                                                                                                                                                            |                                                                                                                             |
| Roux et al., 2009          | Kamiesberg, N. Cape, South Africa | woody scrub, classified as tree savanna | perennial             | forb       |                            | <i>Isotria medeoloides</i>         | 0.03  | excavatio            | n            | 353  | mostly in May-Sep     |      | ephemeral pool on well-drained       |                                                         | granite             |                    |         |                       |                      | -30.4336  | 18.1061   | 1284                                                                                                                                                                                                         | The l. eludens populations in the pool consists of approximately 250 to 300 plants.                                                                                                                                                                                                   | lat-lon approx.                                                                                                             |
| Rutherford, 1983           | northern Transvaal                | tree savanna                            | deciduous broad-leaf  | small tree | Lekkerbreek                | <i>Ochna pulchra</i>               | 2.2   | excavatio            | n            | 630  | summer                |      | well-drained                         | sand, well drained                                      |                     | sandstone with     |         |                       |                      |           |           |                                                                                                                                                                                                              |                                                                                                                                                                                                                                                                                       |                                                                                                                             |









|                      |                   |                          |                          |                      |           |                      |                                |                      |                     |   |          |     |                         |  |                                       |                      |            |                                   |                                |  |  |  |  |              |         |           |           |                                                                                                                                                                           |                                                                                          |
|----------------------|-------------------|--------------------------|--------------------------|----------------------|-----------|----------------------|--------------------------------|----------------------|---------------------|---|----------|-----|-------------------------|--|---------------------------------------|----------------------|------------|-----------------------------------|--------------------------------|--|--|--|--|--------------|---------|-----------|-----------|---------------------------------------------------------------------------------------------------------------------------------------------------------------------------|------------------------------------------------------------------------------------------|
| Sperry, 1935         | Illinois          | temperate deciduous      | The Rantoul station      | perennial            | herb      | prairie golden-rod   | <i>Solidago rigida</i>         | 1.02                 | excavatio           | n | yes      |     |                         |  |                                       | Early Wisconsin      | 0.55 - 1.9 | 1.25                              | brown silt loam                |  |  |  |  | now farmland | 40.3323 | -88.1438  | 223       | penetrate obliquely for several (20-50) cm. from the rhizome before penetrating the roots resembled those of the <i>Solidago</i> but both the rhizomes and the roots were |                                                                                          |
| Sperry, 1935         | Illinois          | temperate deciduous      | The Rantoul station      | perennial            | herb      | flowered             | <i>Aster multiflorus</i>       | 0.72                 | excavatio           | n | yes      |     |                         |  |                                       | Early Wisconsin      | 0.55 - 1.9 | 1.25                              | brown silt loam                |  |  |  |  | now farmland | 40.3323 | -88.1438  | 223       | corresponding measurements at the Rantoul station were 20 cm. 10-100 cm.                                                                                                  |                                                                                          |
| Sperry, 1935         | Illinois          | temperate deciduous      | The Rantoul station      | perennial            | herb      | wild rue             | <i>Ruellia ciliosa</i>         | 1.1                  | excavatio           | n | yes      |     |                         |  |                                       | Early Wisconsin      | 0.55 - 1.9 | 1.25                              | brown silt loam                |  |  |  |  | now farmland | 40.3323 | -88.1438  | 223       | The extensive absorbing region was found between the 20 and 100 cm. levels and a                                                                                          |                                                                                          |
| Sperry, 1935         | Illinois          | temperate deciduous      | The Kansas station       | perennial            | herb      | mountain mint        | <i>Pycnanthemum</i>            | 1.17                 | excavatio           | n | yes      |     |                         |  |                                       | Early Wisconsin      |            |                                   | brown Silt Loam on Drift. well |  |  |  |  | now farmland | 29.5559 | -87.9797  | 214       | was small and short-lived, and had a correspondingly small root system. Twenty                                                                                            |                                                                                          |
| Sperry, 1935         | Illinois          | temperate deciduous      | The Kansas station       | perennial            | grass     | big bluestem         | <i>Andropogon furcatus</i>     | 0.13                 | excavatio           | n | yes      |     |                         |  |                                       | Early Wisconsin      |            |                                   | brown Silt Loam on Drift. well |  |  |  |  | now farmland | 29.5559 | -87.9797  | 214       | At the Kansas station a maximum depth of 93 cm. was found while the absorbing                                                                                             |                                                                                          |
| Sperry, 1935         | Illinois          | temperate deciduous      | The Kansas station       | perennial            | grass     | blue-eyed grass      | <i>Sisyrinchium albidum</i>    | 0.17                 | excavatio           | n | yes      |     |                         |  |                                       | Early Wisconsin      |            |                                   | brown Silt Loam on Drift. well |  |  |  |  | now farmland | 29.5559 | -87.9797  | 214       | was the dominant species at the                                                                                                                                           |                                                                                          |
| Sperry, 1935         | Illinois          | temperate deciduous      | The Kansas station       | perennial            | herb      | blazing star         | <i>Liatris scariosa</i>        | 0.93                 | excavatio           | n | yes      |     |                         |  |                                       | Early Wisconsin      |            |                                   | brown Silt Loam on Drift. well |  |  |  |  | now farmland | 29.5559 | -87.9797  | 214       | The maximum depth and absorbing regions were 140 cm. and 30-140 cm. at the Kansas                                                                                         |                                                                                          |
| Sperry, 1935         | Illinois          | temperate deciduous      | The Kansas station       | perennial            | herb      | purple prairie       | <i>Petalostemu m purpureum</i> | 1.3                  | excavatio           | n | yes      |     |                         |  |                                       | Early Wisconsin      |            |                                   | brown Silt Loam on Drift. well |  |  |  |  | now farmland | 29.5559 | -87.9797  | 214       | was the dominant species at the                                                                                                                                           |                                                                                          |
| Sperry, 1935         | Illinois          | temperate deciduous      | The Kansas station       | perennial            | herb      | prairie golden-rod   | <i>Solidago rigida</i>         | 1.4                  | excavatio           | n | yes      |     |                         |  |                                       | Early Wisconsin      |            |                                   | brown Silt Loam on Drift. well |  |  |  |  | now farmland | 29.5559 | -87.9797  | 214       | Warrensburg station. Its numerous long,                                                                                                                                   |                                                                                          |
| Sperry, 1935         | Illinois          | temperate deciduous      | Warrensburg              | perennial            | grass     | slough grass         | <i>Spartina michauxiana</i>    | 1.59                 | excavatio           | n | yes      |     |                         |  |                                       | a Middle Illinoisian |            |                                   | black clay loam, high lime     |  |  |  |  | now farmland | 39.9490 | -89.0745  | 189       |                                                                                                                                                                           |                                                                                          |
| Sperry, 1935         | Illinois          | temperate deciduous      | The Warrensburg          | perennial            | herb      | prairie cone-flower  | <i>Lepachys pinnata</i>        | 0.75                 | excavatio           | n | yes      |     |                         |  |                                       | a Middle Illinoisian |            |                                   | black clay loam, high lime     |  |  |  |  | now farmland | 39.9490 | -89.0745  | 189       |                                                                                                                                                                           |                                                                                          |
| Sperry, 1935         | Illinois          | temperate deciduous      | The Warrensburg          | perennial            | grass     | big bluestem         | <i>Andropogon furcatus</i>     | 1.77                 | excavatio           | n | yes      |     |                         |  |                                       | a Middle Illinoisian |            |                                   | black clay loam, high lime     |  |  |  |  | now farmland | 39.9490 | -89.0745  | 189       |                                                                                                                                                                           |                                                                                          |
| Sperry, 1935         | Illinois          | temperate deciduous      | The Peterville station   | perennial            | herb      | purple prairie       | <i>Petalostemu m purpureum</i> | 1.75                 | excavatio           | n | yes      |     |                         |  |                                       | near the crest of a  |            |                                   | coarse yellow sand             |  |  |  |  | now farmland | 40.2233 | -89.9816  | 162       | was found only at the Peterville station, in common with other western species. The                                                                                       |                                                                                          |
| Sperry, 1935         | Illinois          | temperate deciduous      | The Peterville station   | perennial            | grass     | western drop-seed    | <i>Sporobolus brevifolius</i>  | 0.49                 | excavatio           | n | yes      |     |                         |  |                                       | near the crest of a  |            |                                   | coarse yellow sand             |  |  |  |  | now farmland | 40.2233 | -89.9816  | 162       | From 5 to 15 (or more) roots originated from the base of each plant and either ran                                                                                        |                                                                                          |
| Sperry, 1935         | Illinois          | temperate deciduous      | The Peterville station   | perennial            | grass     | little bluestem      | <i>Andropogon scoparius</i>    | 1.12                 | excavatio           | n | yes      |     |                         |  |                                       | near the crest of a  |            |                                   | coarse yellow sand             |  |  |  |  | now farmland | 40.2233 | -89.9816  | 162       | The tops of the plants at the Peterville station were taller (16-22 dm.) and showed                                                                                       |                                                                                          |
| Sperry, 1935         | Illinois          | temperate deciduous      | The Peterville station   | perennial            | grass     | western big bluestem | <i>Andropogon furcatus</i>     | 1.08                 | excavatio           | n | yes      |     |                         |  |                                       | near the crest of a  |            |                                   | coarse yellow sand             |  |  |  |  | now farmland | 40.2233 | -89.9816  | 162       | a long thin (1 mm. in diameter) rhizome                                                                                                                                   |                                                                                          |
| Sperry, 1935         | Illinois          | temperate deciduous      | The Peterville station   | perennial            | herb      | western ragweed      | <i>Ambrosia artemisiifolia</i> | 0.99                 | excavatio           | n | yes      |     |                         |  |                                       | near the crest of a  |            |                                   | coarse yellow sand             |  |  |  |  | now farmland | 40.2233 | -89.9816  | 162       | which was traced for 40 cm. in one case                                                                                                                                   |                                                                                          |
| Sperry, 1935         | Illinois          | temperate deciduous      | The Peterville station   | perennial            | herb      | blue aster           | <i>Aster oblongifolius</i>     | 0.73                 | excavatio           | n | yes      |     |                         |  |                                       | near the crest of a  |            |                                   | coarse yellow sand             |  |  |  |  | now farmland | 40.2233 | -89.9816  | 162       | found along the Illinois river which produces numerous brittle fibrous roots                                                                                              |                                                                                          |
| Sperry, 1935         | Illinois          | temperate deciduous      | The Peterville station   | perennial            | herb      | blazing star         | <i>Liatris scariosa</i>        | 0.35                 | excavatio           | n | yes      |     |                         |  |                                       | near the crest of a  |            |                                   | coarse yellow sand             |  |  |  |  | now farmland | 40.2233 | -89.9816  | 162       | This very irregular growth resulted in an                                                                                                                                 |                                                                                          |
| Sperry, 1935         | Illinois          | temperate deciduous      | The Peterville station   | perennial            | shrub     | Carolina rose        | <i>Rosa humilis</i>            | 0.8                  | excavatio           | n | yes      |     |                         |  |                                       | near the crest of a  |            |                                   | coarse yellow sand             |  |  |  |  | now farmland | 40.2233 | -89.9816  | 162       | extensive root system which had a radial                                                                                                                                  |                                                                                          |
| Sperry, 1935         | Illinois          | temperate deciduous      | The Peterville station   | perennial            | succulent | Rocky sand cactus    | <i>Opuntia rafinesquii</i>     | 0.12                 | excavatio           | n | yes      |     |                         |  |                                       | near the crest of a  |            |                                   | coarse yellow sand             |  |  |  |  | now farmland | 40.2233 | -89.9816  | 162       | have shallow lateral roots which were traced as much as 30 cm. before becoming                                                                                            |                                                                                          |
| Sperry & Hacke, 2002 | Great Basin, Utah | arid desert              | Sand site (Skull Valley) | perennial            | shrub     |                      | <i>Chrysothamnus nauseosus</i> | > 1.55 (2m to guess) | soil pits, inferred |   | no       | 194 | mostly in winter        |  | flat valley floor slightly undulating |                      |            | Sand (87% sand, 6% silt, 7% clay) |                                |  |  |  |  |              | 40.2556 | -112.7279 | 1463      | the depth index was positive for all species at both sites, indicating that roots                                                                                         |                                                                                          |
| Sperry & Hacke, 2002 | Great Basin, Utah | arid desert              | Sand site (Buck Valley)  | perennial            | shrub     |                      | <i>Chrysothamnus nauseosus</i> | > 1.55               | soil pits, inferred |   | no       | 273 | winter mostly in winter |  |                                       |                      |            | Sandy loam (59% sand, 29% silt)   |                                |  |  |  |  |              |         | 40.2022   | -112.3019 | 1547                                                                                                                                                                      | extended below 1.55 m at both sites and in all species. There was a maximum of 1 for the |
| Sprackling and Read  | E. Nebraska       | Prairie with planted and | Richardson County        | deciduous broad-leaf | tree      | bur oak              | <i>Quercus macrocarpa</i>      | 4.0                  | excavatio           | n | drawings |     |                         |  |                                       |                      |            | Knock silt loam                   |                                |  |  |  |  |              |         | 40.2589   | -95.5683  | 348                                                                                                                                                                       | The rate of lateral root growth in older trees is greater than the rate of depth.        |
| Sprackling and Read  | E. Nebraska       | Prairie with planted and | Nance County             | deciduous broad-leaf | tree      | bur oak              | <i>Quercus macrocarpa</i>      | 4.9                  | excavatio           | n | drawings |     |                         |  |                                       |                      |            | Peorian and Loveland loess        |                                |  |  |  |  |              |         | 41.4706   | -98.1729  | 550                                                                                                                                                                       | No tap root is apparent, but roots on left                                               |
| Sprackling and Read  | E. Nebraska       | Prairie with planted and | Merrick County           | deciduous broad-leaf | tree      | eastern redcedar     | <i>Juniperus virginiana</i>    | 2.7                  | excavatio           | n | drawings |     |                         |  |                                       |                      |            | Cass sandy loam                   |                                |  |  |  |  |              |         | 40.9856   | -98.1765  | 543                                                                                                                                                                       | side (sinker) have extended 9 feet.                                                      |
| Sprackling and Read  | E. Nebraska       | Prairie with planted and | Merrick County           | deciduous broad-leaf | tree      | eastern redcedar     | <i>Juniperus virginiana</i>    | 2.7                  | excavatio           | n | drawings |     |                         |  |                                       |                      |            | Waukesha fine sandy loam          |                                |  |  |  |  |              |         | 41.0569   | -98.0564  | 528                                                                                                                                                                       | Strong development of a lateral system has been followed by downward penetration         |
| Sprackling and Read  | E. Nebraska       | Prairie with planted and | Nance County             | deciduous broad-leaf | tree      | Hackberry            | <i>Celtis occidentalis</i>     | 2.7                  | excavatio           | n | drawings |     |                         |  |                                       |                      |            | Wabash silt loam                  |                                |  |  |  |  |              |         | 41.3520   | -97.8079  | 489                                                                                                                                                                       | The rapid penetration in root depth of young seedlings (fig 8) has stabilized at a       |
| Sprackling and Read  | E. Nebraska       | Prairie with planted and | Pawnee County            | deciduous broad-leaf | tree      | Honey locust         | <i>Gleditsia triacanthos</i>   | 3.1                  | excavatio           | n | drawings |     |                         |  |                                       |                      |            | Wabash silt loam                  |                                |  |  |  |  |              |         | 40.1981   | -96.1504  | 350                                                                                                                                                                       | development of the lateral root system at depths of 1 to 3 feet is extensive. A          |
| Sprackling and Read  | E. Nebraska       | Prairie with planted and | Dakota County            | deciduous broad-leaf | tree      | black locust         | <i>Robinia pseudoacacia</i>    | 2.4                  | excavatio           | n | drawings |     |                         |  |                                       |                      |            | Cass silty clay loam              |                                |  |  |  |  |              |         | 42.3017   | -96.6926  | 423                                                                                                                                                                       | Black locust, like honey locust, has good drought-resistance. The relatively deep        |
| Sprackling and Read  | E. Nebraska       | Prairie with planted and | Pawnee County            | deciduous broad-leaf | tree      | Osage orange         | <i>Morone paniculata</i>       | 2.4                  | excavatio           | n | drawings |     |                         |  |                                       |                      |            | Sogn silty clay loam              |                                |  |  |  |  |              |         | 40.0808   | -96.3333  | 447                                                                                                                                                                       | This species is well known for drought resistance. In addition to a strong taproot,      |
| Sprackling and Read  | E. Nebraska       | Prairie with planted and | Pawnee County            | deciduous broad-leaf | tree      | Hawthorn             | <i>Crataegus mollis</i>        | 1.5                  | excavatio           | n | drawings |     |                         |  |                                       |                      |            | Carrington silt loam              |                                |  |  |  |  |              |         | 40.0850   | -96.1601  | 351                                                                                                                                                                       | Roots of this tree were deep in relation to its height; this characteristic may be       |
| Sprackling and Read  | E. Nebraska       | Prairie with planted and | Pawnee County            | deciduous broad-leaf | tree      | Smooth sumac         | <i>Rhus glabra</i>             | 2.1                  | excavatio           | n | drawings |     |                         |  |                                       |                      |            | Bartlett silty clay loam          |                                |  |  |  |  |              |         | 40.0311   | -96.3407  | 456                                                                                                                                                                       | Smooth sumac reproduces vegetatively from root suckers, illustrated above.               |
| Sprackling and Read  | E. Nebraska       | Prairie with planted and | Dakota County            | deciduous broad-leaf | tree      | Black walnut         | <i>Juglans nigra</i>           | 3.4                  | excavatio           | n | drawings |     |                         |  |                                       |                      |            | Cass silty clay loam              |                                |  |  |  |  |              |         | 42.3798   | -96.5368  | 347                                                                                                                                                                       | Although this species grows best on moist bottomlands, it has fair drought-resistance    |
| Sprackling and Read  | E. Nebraska       | Prairie with planted and | Richardson County        | deciduous broad-leaf | tree      | Shagbark hickory     | <i>Carya ovata</i>             | 2.2                  | excavatio           | n | drawings |     |                         |  |                                       |                      |            | Knock silt loam                   |                                |  |  |  |  |              |         | 40.2364   | -95.5345  | 350                                                                                                                                                                       | This species, which grows only in extreme eastern Nebraska on deep, moist soils.         |
| Sprackling and Read  | E. Nebraska       | Prairie with planted and | Pawnee County            | deciduous broad-leaf | tree      | Bitternut hickory    | <i>Carya cordiformis</i>       | 3.0                  | excavatio           | n | drawings |     |                         |  |                                       |                      |            | Wabash silt loam                  |                                |  |  |  |  |              |         | 40.2138   | -96.1621  | 350                                                                                                                                                                       | A very strong taproot characterized the root system of this species. The root            |
| Sprackling and Read  | E. Nebraska       | Prairie with planted and | Pawnee County            | deciduous broad-leaf | tree      | Red mulberry         | <i>Morus rubra</i>             | 2.4                  | excavatio           | n | drawings |     |                         |  |                                       |                      |            | Wabash silt loam                  |                                |  |  |  |  |              |         | 40.2494   | -96.1393  | 349                                                                                                                                                                       | No distinct taproot has developed, but a well developed network of fine lateral          |
| Sprackling and Read  | E. Nebraska       | Prairie with planted and | Pawnee County            | deciduous broad-leaf | tree      | Russian mulberry     | <i>Morus alba</i>              | 2.3                  | excavatio           | n | drawings |     |                         |  |                                       |                      |            | Pawnee silty clay loam            |                                |  |  |  |  |              |         | 40.1574   | -96.3512  | 429                                                                                                                                                                       | Introduced into the United States by the                                                 |
| Sprackling and Read  | E. Nebraska       | Prairie with planted and | Nance County             | deciduous broad-leaf | tree      | Plains cottonwood    | <i>Populus deltoides</i>       | 0.8                  | excavatio           | n | drawings |     |                         |  |                                       |                      |            | Cass loam                         |                                |  |  |  |  |              |         | 41.3838   | -97.8965  | 488                                                                                                                                                                       | In this instance, a tree 60 feet high has roots only 2.5 feet deep. A water table very   |
| Sprackling and Read  | E. Nebraska       | Prairie with planted and | Dakota County            | deciduous broad-leaf | tree      | Plains cottonwood    | <i>Populus deltoides</i>       | 3.8                  | excavatio           | n | drawings |     |                         |  |                                       |                      |            | Cass silty clay loam              |                                |  |  |  |  |              |         | 42.4337   | -96.4298  | 335                                                                                                                                                                       | Roots of this tree have grown downward to 12 feet just above the water table level.      |
| Sprackling and Read  | E. Nebraska       | Prairie with planted and | Dakota County            | deciduous broad-leaf | tree      | Plains cottonwood    | <i>Populus deltoides</i>       | 3.7                  | excavatio           | n | drawings |     |                         |  |                                       |                      |            | Marshall silt loam                |                                |  |  |  |  |              |         | 42.3733   | -96.6230  | 374                                                                                                                                                                       | Roots of this older cottonwood, on an upland site where the water table is out of        |
| Sprackling and Read  | E. Nebraska       | Prairie with planted and | Pawnee County            | deciduous broad-leaf | tree      | Green Ash            | <i>Fraxinus pennsylvanic</i>   | 2.7                  | excavatio           | n | drawings |     |                         |  |                                       |                      |            | Carrington silty clay loam        |                                |  |  |  |  |              |         | 40.0642   | -96.1608  | 352                                                                                                                                                                       | A fine network of lateral roots of medium depth characterizes green ash.                 |
| Sprackling and Read  | E. Nebraska       | Prairie with planted and | Merrick County           | deciduous broad-leaf | tree      | Green Ash            | <i>Fraxinus pennsylvanic</i>   | 2.7                  | excavatio           | n | drawings |     |                         |  |                                       |                      |            | Cass loamy sand                   |                                |  |  |  |  |              |         | 40.9456   | -98.2649  | 556                                                                                                                                                                       | Roots penetrated to 9 feet, the same depth as the 75-year-old green ash in figure 37.    |
| Sprackling and Read  | E. Nebraska       | Prairie with planted and | Richardson County        | deciduous broad-leaf | tree      | White ash            | <i>Fraxinus americana</i>      | 1.8                  | excavatio           | n | drawings |     |                         |  |                                       |                      |            | Knock silt loam                   |                                |  |  |  |  |              |         | 40.2292   | -95.5565  | 345                                                                                                                                                                       | The root system of white ash, a native of upland sites along the Missouri River in       |
| Sprackling and Read  | E. Nebraska       | Prairie with planted and | Dakota County            | deciduous broad-leaf | tree      | Siberian elm         | <i>Ulmus pumila</i>            | 2.9                  | excavatio           | n | drawings |     |                         |  |                                       |                      |            | Cass silty clay loam              |                                |  |  |  |  |              |         | 42.4304   | -96.6780  | 370                                                                                                                                                                       | A fast-growing introduction from eastern Asia, Siberian elm is well adapted to a         |
| Sprackling and Read  | E. Nebraska       | Prairie with planted and | Merrick County           | deciduous broad-leaf | tree      | Siberian elm         | <i>Ulmus pumila</i>            | 2.0                  | excavatio           | n | drawings |     |                         |  |                                       |                      |            | Cass sandy loam                   |                                |  |  |  |  |              |         | 41.2485   | -97.7653  | 487                                                                                                                                                                       | The high water table typically results in a shallow but very wide-spreading root         |
| Sprackling and Read  | E. Nebraska       | Prairie with planted and | Dakota County            | deciduous broad-leaf | tree      | Siberian elm         | <i>Ulmus pumila</i>            | 4.9                  | excavatio           | n | drawings |     |                         |  |                                       |                      |            | Sarpy very fine sandy loam        |                                |  |  |  |  |              |         | 42.3198   | -96.7078  | 417                                                                                                                                                                       | Roots penetrated directly to the water table at 16 feet; lateral development was         |
| Sprackling and Read  | E. Nebraska       | Prairie with planted and | Dakota County            | deciduous broad-leaf | tree      | Northern catalpa     | <i>Catalpa speciosa</i>        | 3.1                  | excavatio           | n | drawings |     |                         |  |                                       |                      |            | Sarpy very fine sandy loam        |                                |  |  |  |  |              |         | 42.3045   | -96.7075  | 421                                                                                                                                                                       | Catalpa was introduced in Nebraska from the southern states as a commercial fence        |
| Sprackling and Read  | E. Nebraska       | Prairie with planted and | Pawnee County            | deciduous broad-leaf | tree      | American sycamore    | <i>Platanus occidentalis</i>   | 2.7                  | excavatio           | n | drawings |     |                         |  |                                       |                      |            | Wabash silt loam                  |                                |  |  |  |  |              |         | 40.1052   | -96.1542  | 350                                                                                                                                                                       | The tree shown here was growing in a swamp that had filled with alluvium.                |
| Sprackling and Read  | E. Nebraska       | Prairie with planted and | Pawnee County            | deciduous broad-leaf | tree      | Silver maple         | <i>Acer saccharinum</i>        | 3.4                  | excavatio           | n | drawings |     |                         |  |                                       |                      |            | Wabash silt loam                  |                                |  |  |  |  |              |         | 40.1815   | -96.0729  | 309                                                                                                                                                                       | A fast growing, shallow-rooted native species that prefers bottomland sites, silver      |
| Sprackling and Read  | E. Nebraska       | Prairie with planted and | Pawnee County            | deciduous broad-leaf | tree      | apple                | <i>Malus domestica</i>         | 3.4                  | excavatio           | n | drawings |     |                         |  |                                       |                      |            | Butler silt loam                  |                                |  |  |  |  |              |         | 40.0211   | -96.2929  | 432                                                                                                                                                                       | Growing on a dry upland site, this apple tree had relatively deep roots.                 |
| Sprackling and Read  | E. Nebraska       | Prairie with planted and | Pawnee County            | deciduous broad-leaf | tree      | Prickly-ash          | <i>Zanthoxylum americanum</i>  | 1.6                  | excavatio           | n | drawings |     |                         |  |                                       |                      |            | Sogn stony loam                   |                                |  |  |  |  |              |         | 40.0311   | -96.3407  | 456                                                                                                                                                                       | The above illustration represents a deep and widespread root system for such a           |
| Sprackling and Read  | E. Nebraska       | Prairie with planted and | Merrick County           | deciduous broad-leaf | tree      | American elm         | <i>Ulmus americana</i>         | 2.2                  | excavatio           | n | drawings |     |                         |  |                                       |                      |            | Cass sandy loam                   |                                |  |  |  |  |              |         | 41.1337   | -97.9986  | 518                                                                                                                                                                       | This tree was growing on bottomland with the water table fairly close to the surface.    |
| Sprackling and Read  | E. Nebraska       | Prairie with planted and | Richardson County        | deciduous broad-leaf | tree      | American elm         | <i>Ulmus americana</i>         | 1.8                  | excavatio           | n | drawings |     |                         |  |                                       |                      |            | Wabash silt loam                  |                                |  |  |  |  |              |         | 40.1739   | -95.9656  | 315                                                                                                                                                                       | This tree had a well defined taproot system, which was fairly shallow for a tree         |
| Sprackling and Read  | E. Nebraska       | Prairie with planted and | Pawnee County            | deciduous broad-leaf | tree      | Slippery elm         | <i>Ulmus rubra</i>             | 2.1                  | excavatio           | n | drawings |     |                         |  |                                       |                      |            |                                   |                                |  |  |  |  |              |         |           |           |                                                                                                                                                                           |                                                                                          |
